# Supplementary material
Source: PubMed Central journal article supplement (PMC2930111)
Supplement: NIHMS222438-supplement-1.pdf [file NIHMS222438-supplement-1.pdf]

# Common genetic variation in the *HLA* region is associated with late-onset sporadic Parkinson's disease

Taye H Hamza, Cyrus P Zabetian, Albert Tenesa, Alain Laederach, Jennifer Montimurro, Dora Yearout, Denise M Kay, Kimberly F Doheny, Justin Paschall, Elizabeth Pugh, Victoria Kusel, Randall Collura, John Roberts, Alida Griffith, Ali Samii, William K Scott, John Nutt, Stewart A Factor & Haydeh Payami

## Supplementary Material

| PAGE | CONTENT:                                                                                                           |
|------|--------------------------------------------------------------------------------------------------------------------|
| 2    | Supplementary Table 1. Subjects                                                                                    |
| 3-4  | Supplementary Table 2. Association of <i>HLA</i> rs3129882 across disease strata and population structure          |
| 5-6  | Supplementary Table 3. In silico replication of SNPs that reached $P < 10^{-5}$ in NGRC.                           |
| 7-8  | Supplementary Table 4. Replication of other GWAS                                                                   |
| 9-11 | Supplementary Table 5. <i>HLA</i> , PC1 and PD.                                                                    |
| 12   | Supplementary Figure 1. Population substructure in Americans of European ancestry                                  |
| 13   | Supplementary Figure 2. Quantile-quantile plot                                                                     |
| 14   | Supplementary Figure 3. <i>GAK</i> ( <i>PARK17</i> )                                                               |
| 15   | Supplementary Figure 4. Odds ratios for the combination of <i>SNCA</i> , <i>MAPT</i> , <i>GAK</i> and <i>HLA</i> . |
| 16   | Supplementary Figure 5. Localization of genomic regions associated with principal component                        |
| 17   | Supplementary Figure 6. LD between PD-associated SNPs and PC1-associated SNPs within <i>HLA</i>                    |
| 18   | Supplementary References                                                                                           |

### Supplementary Table 1. Subjects

| Group     | Subjects genotyped |                        | Subjects excluded |                       | Subjects analyzed |          |                        |                  |
|-----------|--------------------|------------------------|-------------------|-----------------------|-------------------|----------|------------------------|------------------|
|           | N                  | Call rate<br>Mean±s.d. | Enrolled<br>twice | Related<br>PI_HAT>.15 | N                 | %<br>Men | Onset age<br>Mean±s.d. | Age<br>Mean±s.d. |
| Parkinson | 2014               | 99.92±0.08             | 1                 | 13                    | 2000              | 67.3     | 58.34±11.93            | 67.26±10.67      |
| Controls  | 1999               | 99.92±0.08             | 3                 | 10                    | 1986              | 38.7     | --                     | 70.32±14.09      |
| Total     | 4013               | 99.92±0.08             | 4                 | 23                    | 3986              | 100.0    | 58.34±11.93            | 68.78±12.58      |

**Supplementary Table 2. Association of HLA rs3129882 across disease strata and population structure**

| Strata                                                    | N Case | N Control | MAF Case | MAF Control | HW   | P-value               | OR(95%CI)       |
|-----------------------------------------------------------|--------|-----------|----------|-------------|------|-----------------------|-----------------|
| <b>NGRC all subjects</b>                                  | 2000   | 1986      | 0.46     | 0.40        | 1.00 | 2.9x10 <sup>-8</sup>  | 1.31(1.19-1.44) |
| <b>PD-associated strata</b>                               |        |           |          |             |      |                       |                 |
| Non-Familial                                              | 1565   | 1986      | 0.47     | 0.40        | 1.00 | 5.5x10 <sup>-10</sup> | 1.38(1.25-1.52) |
| Familial                                                  | 435    | 1986      | 0.42     | 0.40        | 1.00 | 0.15                  | 1.12(0.96-1.31) |
| Late onset                                                | 1480   | 1986      | 0.46     | 0.40        | 1.00 | 2.4x10 <sup>-8</sup>  | 1.34(1.21-1.48) |
| Early onset                                               | 519    | 1986      | 0.45     | 0.40        | 1.00 | 3.1x10 <sup>-3</sup>  | 1.27(1.08-1.49) |
| Male                                                      | 1346   | 769       | 0.46     | 0.38        | 0.25 | 1.1x10 <sup>-7</sup>  | 1.43(1.25-1.63) |
| Female                                                    | 654    | 1217      | 0.45     | 0.41        | 0.37 | 1.7x10 <sup>-2</sup>  | 1.18(1.03-1.36) |
| Smokers                                                   | 732    | 696       | 0.47     | 0.39        | 1.0  | 8.5x10 <sup>-5</sup>  | 1.38(1.18-1.62) |
| Non-smokers                                               | 866    | 810       | 0.45     | 0.40        | 0.61 | 6.5x10 <sup>-3</sup>  | 1.23(1.06-1.43) |
| Coffee-High                                               | 512    | 387       | 0.47     | 0.40        | 0.40 | 4.1x10 <sup>-3</sup>  | 1.34(1.10-1.63) |
| Coffee-Low                                                | 946    | 544       | 0.45     | 0.40        | 0.25 | 8.6x10 <sup>-3</sup>  | 1.24(1.06-1.46) |
| NSAIDs user                                               | 976    | 657       | 0.46     | 0.40        | 0.51 | 2.5x10 <sup>-3</sup>  | 1.26(1.09-1.47) |
| No-NSAIDs                                                 | 594    | 326       | 0.46     | 0.40        | 0.82 | 6.9x10 <sup>-3</sup>  | 1.32(1.08-1.62) |
| <b>Ashkenazi Jewish Ancestry</b>                          |        |           |          |             |      |                       |                 |
| Yes (genetically defined)*                                | 89     | 40        | 0.45     | 0.38        | 1.00 | 0.41                  | 1.28(0.71-2.28) |
| No (genetically defined core subsample)*                  | 1214   | 1272      | 0.44     | 0.39        | 0.81 | 1.6x10 <sup>-4</sup>  | 1.26(1.12-1.42) |
| No/unknown by self report                                 | 1911   | 1946      | 0.46     | 0.40        | 1.00 | 1.5x10 <sup>-8</sup>  | 1.32(1.20-1.45) |
| <b>Recruitment site in United States</b>                  |        |           |          |             |      |                       |                 |
| New York                                                  | 412    | 300       | 0.52     | 0.46        | 0.35 | 0.022                 | 1.30(1.04-1.63) |
| Oregon                                                    | 504    | 898       | 0.43     | 0.40        | 0.15 | 0.114                 | 1.14(0.97-1.35) |
| Georgia                                                   | 231    | 113       | 0.47     | 0.37        | 1.00 | 0.012                 | 1.57(1.10-2.23) |
| Washington                                                | 853    | 675       | 0.44     | 0.36        | 0.21 | 6.3x10 <sup>-5</sup>  | 1.39(1.18-1.63) |
| <b>European country of paternal &amp; maternal origin</b> |        |           |          |             |      |                       |                 |
| Great Britain                                             | 120    | 72        | 0.46     | 0.35        | 0.80 | 8x10 <sup>-3</sup>    | 1.93(1.19-3.14) |
| Germany/ Austria                                          | 101    | 54        | 0.48     | 0.35        | 1.00 | 0.08                  | 1.57(0.95-2.60) |
| Ireland                                                   | 44     | 26        | 0.42     | 0.40        | 0.44 | 0.79                  | 1.11(0.52-2.36) |
| Scandinavia                                               | 65     | 34        | 0.49     | 0.37        | 0.29 | 0.21                  | 1.45(0.81-2.61) |
| Eastern Europe                                            | 41     | 32        | 0.51     | 0.39        | 1.00 | 0.15                  | 1.68(0.83-3.40) |
| Italy                                                     | 56     | 36        | 0.63     | 0.46        | 0.50 | 0.05                  | 2.10(0.99-4.44) |
| Russia                                                    | 27     | 10        | 0.52     | 0.35        | 1.00 | 0.16                  | 2.29(0.72-7.28) |
| <b>European country of paternal or maternal origin</b>    |        |           |          |             |      |                       |                 |
| Great Britain                                             | 537    | 356       | 0.44     | 0.37        | 0.73 | 2x10 <sup>-3</sup>    | 1.38(1.13-1.70) |
| Germany/ Austria                                          | 442    | 269       | 0.45     | 0.40        | 0.90 | 0.062                 | 1.24(0.99-1.56) |
| Ireland                                                   | 249    | 162       | 0.41     | 0.44        | 0.42 | 0.189                 | 0.81(0.59-1.11) |
| Scandinavia                                               | 226    | 146       | 0.42     | 0.35        | 0.86 | 0.044                 | 1.40(1.01-1.95) |
| Eastern Europe                                            | 92     | 78        | 0.48     | 0.43        | 0.49 | 0.244                 | 1.32(0.83-2.09) |
| Italy                                                     | 91     | 68        | 0.57     | 0.47        | 0.63 | 0.164                 | 1.41(0.87-2.27) |
| France                                                    | 82     | 68        | 0.44     | 0.44        | 0.15 | 0.646                 | 1.13(0.66-1.93) |
| Russia                                                    | 64     | 23        | 0.53     | 0.45        | 1.00 | 0.217                 | 1.59(0.76-3.33) |

Analyses were adjusted for PC1, PC2, sex and age. Tests of heterogeneity were performed within each strata; the differences were not significant unless noted below.

**Family history:** Patients who had at least one first or second degree relative with PD were classified as familial. All others were classified as non-familial (sporadic). MAF of the risk allele and OR were significantly higher in sporadic PD than familial PD (P=0.01 for MAF, P=0.02 for OR), however, the differences were not significant after adjusting for number of strata tests performed.

**Age at onset:** Late-onset defined as age >50 years, early onset as ≤50 years.

**Smoker:** >100 cigarettes in lifetime.

**Coffee:** Number of cups of caffeinated coffee drank per day multiplied by the number of years of consumption; high and low divided at the median in controls.

**NSAIDs:** Ever or never use of over the counter NSAIDs.

**\*Jewish/Non-Jewish clusters:** The core of the Jewish cluster was defined within  $0.04 \leq PC1 \leq 0.055$  and  $0.001 \leq PC2 \leq 0.013$ . A core within non-Jewish Caucasian cluster was defined within  $-0.0075 \leq PC1 \leq 0.0025$  &  $-0.005 \leq PC2 \leq 0.003$ .

**Recruitment site:** US states where subjects were recruited from. Test of heterogeneity across recruitment sites was significant for MAF ( $P=0.0007$ ) but not for OR ( $P=0.16$ ), indicating consistent evidence for association with PD despite varying allele frequency.

**Paternal or maternal ancestry:** Self reports of the countries from which ancestors immigrated to US. Since having only one lineage tracing back to a country was sufficient for this classification, an individual may fall in more than one group, and there could exist substructure within each group (for example, children of a couple of Irish and Italian origin). Test of heterogeneity across countries was marginal for MAF ( $P=0.08$ ) but OR were consistently  $>1$  ( $P_{\text{heterogeneity}}=0.16$ ), indicating consistent evidence for association with PD despite varying allele frequency.

**Paternal & maternal ancestry:** Smaller group of subjects whose both paternal and maternal lineage were said to have originated from the same country.

**Supplementary Table 3: In silico replication of SNPs that reached P<10<sup>-5</sup> in NGRC.**

We used the individual-level “CIDR” dataset from dbGaP (Pankratz et al)<sup>1</sup> and Cochran-Mantel-Haenszel (CMH) test statistics for Meta-analysis. We imputed the SNPs that were not present in CIDR dataset using CEU-OMNI-HapMaP as reference panel. Heterogeneity between the two studies was tested using Breslow-Day (BD) test statistics.

| CHR                                                     | SNP        | BP        | A1 | NGRC |         |      |      |      |      |         |      | CIDR from dbGaP <sup>1</sup> |      |      |      |      |        | Meta-Analysis |      |      |        |      |      |      |         |
|---------------------------------------------------------|------------|-----------|----|------|---------|------|------|------|------|---------|------|------------------------------|------|------|------|------|--------|---------------|------|------|--------|------|------|------|---------|
|                                                         |            |           |    | MAF  |         | P    |      | MAF  |      | P       |      | MAF                          |      | P    |      | P    | OR     | L95           | U95  | P    |        |      |      |      |         |
|                                                         |            |           |    | Case | Control | HWE  | OR   | L95  | U95  | P       | Case | Control                      | HWE  | OR   | L95  |      |        |               |      |      | U95    | P    | BD   | CMH  |         |
| SNPs that were genotyped in both NGRC and CIDR datasets |            |           |    |      |         |      |      |      |      |         |      |                              |      |      |      |      |        |               |      |      |        |      |      |      |         |
| 1                                                       | rs1826316  | 101645453 | C  | 0.17 | 0.21    | 0.84 | 0.75 | 0.66 | 0.84 | 1.5E-6  | 0.19 | 0.18                         | 0.42 | 1.10 | 0.91 | 1.32 | 0.32   | 0.18          | 0.20 | 0.82 | 1.1E-3 | 0.84 | 0.76 | 0.92 | 3.4E-4  |
| 2                                                       | rs870575   | 45356764  | T  | 0.20 | 0.25    | 0.21 | 0.75 | 0.68 | 0.84 | 5.9E-7  | 0.25 | 0.24                         | 0.34 | 1.00 | 0.85 | 1.18 | 0.98   | 0.22          | 0.25 | 0.12 | 0.02   | 0.83 | 0.76 | 0.91 | 8.9E-5  |
| 3                                                       | rs4678550  | 36778998  | C  | 0.16 | 0.20    | 0.32 | 0.76 | 0.67 | 0.85 | 6.4E-6  | 0.17 | 0.17                         | 0.40 | 0.95 | 0.79 | 1.14 | 0.56   | 0.16          | 0.19 | 0.20 | 0.02   | 0.81 | 0.74 | 0.90 | 5.3E-5  |
| 4                                                       | rs2736990  | 90897564  | C  | 0.51 | 0.45    | 0.22 | 1.30 | 1.18 | 1.42 | 5.0E-8  | 0.47 | 0.53                         | 0.37 | 1.32 | 1.14 | 1.53 | 1.9E-4 | 0.52          | 0.46 | 0.60 | 0.85   | 1.28 | 1.19 | 1.38 | 1.7E-10 |
| 4                                                       | rs1350855  | 91413829  | T  | 0.34 | 0.39    | 1.00 | 0.79 | 0.72 | 0.87 | 1.3E-6  | 0.37 | 0.39                         | 1.00 | 0.89 | 0.77 | 1.03 | 0.12   | 0.35          | 0.39 | 0.97 | 0.31   | 0.83 | 0.77 | 0.90 | 3.5E-6  |
| 6                                                       | rs3117098  | 32466491  | C  | 0.33 | 0.28    | 0.83 | 1.27 | 1.15 | 1.41 | 2.9E-6  | 0.32 | 0.29                         | 0.50 | 1.18 | 1.01 | 1.38 | 0.04   | 0.33          | 0.29 | 0.85 | 0.30   | 1.25 | 1.15 | 1.36 | 1.8E-7  |
| 6                                                       | rs3129955  | 32473818  | T  | 0.33 | 0.28    | 0.87 | 1.27 | 1.15 | 1.40 | 3.8E-6  | 0.32 | 0.29                         | 0.50 | 1.18 | 1.01 | 1.38 | 0.04   | 0.33          | 0.29 | 0.82 | 0.27   | 1.25 | 1.15 | 1.35 | 2.1E-7  |
| 6                                                       | rs3129882  | 32517508  | G  | 0.46 | 0.40    | 1.00 | 1.31 | 1.19 | 1.44 | 2.9E-8  | 0.45 | 0.41                         | 0.57 | 1.21 | 1.04 | 1.39 | 0.01   | 0.46          | 0.40 | 0.72 | 0.24   | 1.28 | 1.19 | 1.39 | 2.8E-10 |
| 8                                                       | rs2046571  | 122424893 | A  | 0.34 | 0.29    | 0.45 | 1.28 | 1.15 | 1.41 | 1.9E-6  | 0.33 | 0.30                         | 0.06 | 1.15 | 0.98 | 1.33 | 0.08   | 0.33          | 0.29 | 0.09 | 0.69   | 1.24 | 1.14 | 1.34 | 3.6E-7  |
| 8                                                       | rs6981998  | 131622396 | G  | 0.18 | 0.15    | 0.72 | 1.35 | 1.19 | 1.53 | 4.3E-6  | 0.18 | 0.16                         | 0.80 | 1.06 | 0.88 | 1.28 | 0.52   | 0.18          | 0.15 | 0.94 | 0.32   | 1.27 | 1.15 | 1.41 | 5.3E-6  |
| 10                                                      | rs7096608  | 15239759  | C  | 0.15 | 0.12    | 0.75 | 1.38 | 1.21 | 1.58 | 2.9E-6  | 0.14 | 0.14                         | 0.89 | 1.02 | 0.82 | 1.25 | 0.89   | 0.15          | 0.13 | 0.73 | 0.03   | 1.23 | 1.11 | 1.38 | 1.8E-4  |
| 17                                                      | rs4790246  | 4912379   | A  | 0.50 | 0.46    | 0.59 | 1.24 | 1.13 | 1.36 | 5.3E-6  | 0.47 | 0.49                         | 0.84 | 0.92 | 0.79 | 1.06 | 0.23   | 0.49          | 0.47 | 0.76 | 4.2E-3 | 1.12 | 1.04 | 1.21 | 4.4E-3  |
| 17                                                      | rs12185268 | 41279463  | G  | 0.18 | 0.23    | 0.03 | 0.76 | 0.68 | 0.86 | 6.7E-6  | 0.18 | 0.23                         | 0.08 | 0.71 | 0.60 | 0.85 | 2.1E-4 | 0.18          | 0.23 | 0.39 | 0.27   | 0.75 | 0.69 | 0.83 | 4.2E-9  |
| 17                                                      | rs17660464 | 41533806  | A  | 0.18 | 0.23    | 0.03 | 0.76 | 0.68 | 0.86 | 7.5E-6  | 0.18 | 0.23                         | 0.08 | 0.71 | 0.60 | 0.85 | 1.9E-4 | 0.18          | 0.23 | 0.42 | 0.21   | 0.75 | 0.69 | 0.83 | 4.3E-9  |
| 17                                                      | rs199533   | 42184098  | T  | 0.17 | 0.22    | 0.05 | 0.74 | 0.66 | 0.84 | 1.3E-6  | 0.16 | 0.21                         | 0.05 | 0.73 | 0.61 | 0.88 | 8.4E-4 | 0.17          | 0.21 | 0.62 | 0.47   | 0.74 | 0.67 | 0.82 | 2.0E-9  |
| SNPs that were genotyped in NGRC and imputed for CIDR   |            |           |    |      |         |      |      |      |      |         |      |                              |      |      |      |      |        |               |      |      |        |      |      |      |         |
| 1                                                       | rs263912   | 101747739 | T  | 0.14 | 0.18    | 0.82 | 0.73 | 0.64 | 0.83 | 2.2E-6  | 0.15 | 0.14                         | 0.88 | 1.12 | 0.91 | 1.37 | 0.30   | 0.14          | 0.17 | 0.63 | 3.0E-3 | 0.83 | 0.75 | 0.92 | 5.1E-4  |
| 4                                                       | rs356220   | 90860363  | T  | 0.44 | 0.36    | 0.38 | 1.38 | 1.25 | 1.52 | 3.4E-11 | 0.47 | 0.40                         | 0.77 | 1.40 | 1.21 | 1.62 | 9.9E-6 | 0.45          | 0.37 | 0.55 | 0.72   | 1.37 | 1.27 | 1.48 | 2.9E-15 |
| 4                                                       | rs356168   | 90893454  | G  | 0.52 | 0.45    | 0.28 | 1.30 | 1.18 | 1.42 | 4.6E-8  | 0.47 | 0.53                         | 0.37 | 1.33 | 1.15 | 1.54 | 1.5E-4 | 0.52          | 0.46 | 0.68 | 0.80   | 1.29 | 1.19 | 1.39 | 1.0E-10 |
| 6                                                       | rs3117104  | 32456287  | A  | 0.33 | 0.28    | 0.91 | 1.27 | 1.15 | 1.40 | 4.0E-6  | 0.32 | 0.29                         | 0.50 | 1.19 | 1.01 | 1.39 | 0.03   | 0.33          | 0.28 | 0.78 | 0.30   | 1.25 | 1.15 | 1.36 | 1.8E-7  |
| 6                                                       | rs3117102  | 32458085  | G  | 0.33 | 0.28    | 0.87 | 1.27 | 1.15 | 1.40 | 3.9E-6  | 0.32 | 0.29                         | 0.50 | 1.19 | 1.01 | 1.39 | 0.03   | 0.33          | 0.28 | 0.82 | 0.29   | 1.25 | 1.15 | 1.36 | 1.9E-7  |
| 6                                                       | rs3129948  | 32462622  | C  | 0.33 | 0.28    | 0.83 | 1.27 | 1.15 | 1.40 | 4.2E-6  | 0.32 | 0.29                         | 0.50 | 1.19 | 1.01 | 1.39 | 0.03   | 0.33          | 0.28 | 0.85 | 0.31   | 1.25 | 1.15 | 1.35 | 2.1E-7  |
| 6                                                       | rs3129954  | 32473558  | A  | 0.33 | 0.28    | 0.78 | 1.27 | 1.15 | 1.40 | 3.9E-6  | 0.32 | 0.29                         | 0.50 | 1.19 | 1.01 | 1.39 | 0.03   | 0.33          | 0.28 | 0.89 | 0.31   | 1.25 | 1.15 | 1.36 | 1.9E-7  |
| 10                                                      | rs7915262  | 15238590  | C  | 0.15 | 0.12    | 0.75 | 1.38 | 1.21 | 1.58 | 2.8E-6  | 0.14 | 0.13                         | 0.46 | 1.05 | 0.85 | 1.30 | 0.66   | 0.15          | 0.12 | 0.49 | 0.05   | 1.25 | 1.12 | 1.40 | 6.8E-5  |
| 11                                                      | rs10741569 | 12173555  | A  | 0.30 | 0.25    | 0.51 | 1.28 | 1.16 | 1.43 | 3.2E-6  | 0.30 | 0.29                         | 0.93 | 1.02 | 0.87 | 1.19 | 0.82   | 0.30          | 0.26 | 0.59 | 0.09   | 1.19 | 1.09 | 1.29 | 8.2E-5  |
| 17                                                      | rs241041   | 41069708  | C  | 0.18 | 0.23    | 0.03 | 0.76 | 0.68 | 0.86 | 5.8E-6  | 0.18 | 0.23                         | 0.08 | 0.72 | 0.60 | 0.86 | 2.4E-4 | 0.18          | 0.23 | 0.42 | 0.29   | 0.75 | 0.68 | 0.83 | 3.6E-9  |
| 17                                                      | rs241039   | 41070456  | A  | 0.18 | 0.23    | 0.03 | 0.76 | 0.68 | 0.86 | 6.3E-6  | 0.18 | 0.23                         | 0.08 | 0.72 | 0.60 | 0.86 | 2.4E-4 | 0.18          | 0.23 | 0.42 | 0.28   | 0.75 | 0.68 | 0.83 | 3.9E-9  |
| 17                                                      | rs2942168  | 41070633  | T  | 0.18 | 0.23    | 0.03 | 0.76 | 0.68 | 0.86 | 5.3E-6  | 0.18 | 0.23                         | 0.08 | 0.72 | 0.60 | 0.86 | 2.4E-4 | 0.18          | 0.23 | 0.39 | 0.29   | 0.75 | 0.68 | 0.83 | 3.3E-9  |
| 17                                                      | rs2942167  | 41070801  | G  | 0.18 | 0.23    | 0.03 | 0.76 | 0.68 | 0.86 | 5.8E-6  | 0.18 | 0.23                         | 0.08 | 0.72 | 0.60 | 0.86 | 2.4E-4 | 0.18          | 0.23 | 0.42 | 0.29   | 0.75 | 0.68 | 0.83 | 3.6E-9  |
| 17                                                      | rs17334797 | 41181683  | G  | 0.18 | 0.23    | 0.03 | 0.76 | 0.68 | 0.86 | 6.2E-6  | 0.18 | 0.23                         | 0.08 | 0.72 | 0.60 | 0.86 | 2.4E-4 | 0.18          | 0.23 | 0.39 | 0.28   | 0.75 | 0.69 | 0.83 | 4.0E-9  |
| 17                                                      | rs17426064 | 41184469  | T  | 0.18 | 0.23    | 0.02 | 0.76 | 0.68 | 0.86 | 5.7E-6  | 0.18 | 0.23                         | 0.08 | 0.72 | 0.60 | 0.86 | 2.4E-4 | 0.18          | 0.23 | 0.39 | 0.28   | 0.75 | 0.68 | 0.83 | 3.2E-9  |
| 17                                                      | rs12150390 | 41252009  | C  | 0.18 | 0.23    | 0.02 | 0.76 | 0.68 | 0.86 | 6.6E-6  | 0.18 | 0.23                         | 0.08 | 0.72 | 0.60 | 0.86 | 2.4E-4 | 0.18          | 0.23 | 0.39 | 0.29   | 0.75 | 0.69 | 0.83 | 4.0E-9  |
| 17                                                      | rs1912151  | 41258725  | A  | 0.18 | 0.23    | 0.03 | 0.76 | 0.68 | 0.86 | 7.3E-6  | 0.18 | 0.23                         | 0.08 | 0.72 | 0.60 | 0.86 | 2.4E-4 | 0.18          | 0.23 | 0.39 | 0.31   | 0.75 | 0.69 | 0.83 | 4.4E-9  |
| 17                                                      | rs1396862  | 41258778  | T  | 0.18 | 0.23    | 0.02 | 0.76 | 0.68 | 0.86 | 6.8E-6  | 0.18 | 0.23                         | 0.08 | 0.72 | 0.60 | 0.86 | 2.4E-4 | 0.18          | 0.23 | 0.37 | 0.29   | 0.75 | 0.69 | 0.83 | 4.4E-9  |
| 17                                                      | rs17763086 | 41261262  | G  | 0.18 | 0.23    | 0.02 | 0.76 | 0.68 | 0.86 | 7.2E-6  | 0.18 | 0.23                         | 0.08 | 0.72 | 0.60 | 0.86 | 2.4E-4 | 0.18          | 0.23 | 0.39 | 0.29   | 0.75 | 0.69 | 0.83 | 4.4E-9  |
| 17                                                      | rs16940665 | 41263677  | C  | 0.18 | 0.23    | 0.02 | 0.76 | 0.68 | 0.86 | 6.0E-6  | 0.18 | 0.23                         | 0.08 | 0.72 | 0.60 | 0.86 | 2.4E-4 | 0.18          | 0.23 | 0.37 | 0.29   | 0.75 | 0.68 | 0.83 | 3.6E-9  |
| 17                                                      | rs1876828  | 41267306  | A  | 0.18 | 0.23    | 0.05 | 0.76 | 0.68 | 0.86 | 7.6E-6  | 0.18 | 0.23                         | 0.08 | 0.72 | 0.60 | 0.86 | 2.4E-4 | 0.18          | 0.23 | 0.52 | 0.31   | 0.75 | 0.68 | 0.83 | 3.9E-9  |
| 17                                                      | rs878886   | 41268271  | G  | 0.18 | 0.23    | 0.03 | 0.76 | 0.68 | 0.86 | 7.6E-6  | 0.18 | 0.23                         | 0.08 | 0.72 | 0.60 | 0.86 | 2.4E-4 | 0.18          | 0.23 | 0.42 | 0.27   | 0.75 | 0.69 | 0.83 | 4.6E-9  |
| 17                                                      | rs878887   | 41268363  | T  | 0.18 | 0.23    | 0.03 | 0.76 | 0.68 | 0.86 | 6.9E-6  | 0.18 | 0.23                         | 0.08 | 0.72 | 0.60 | 0.86 | 2.4E-4 | 0.18          | 0.23 | 0.39 | 0.29   | 0.75 | 0.69 | 0.83 | 4.3E-9  |
| 17                                                      | rs878888   | 41268416  | G  | 0.18 | 0.23    | 0.02 | 0.76 | 0.68 | 0.86 | 7.1E-6  | 0.18 | 0.23                         | 0.08 | 0.72 | 0.60 | 0.86 | 2.4E-4 | 0.18          | 0.23 | 0.39 | 0.28   | 0.75 | 0.69 | 0.83 | 4.4E-9  |

|    |            |          |   |      |      |      |      |      |      |        |      |      |      |      |      |      |        |      |      |      |      |      |      |      |        |
|----|------------|----------|---|------|------|------|------|------|------|--------|------|------|------|------|------|------|--------|------|------|------|------|------|------|------|--------|
| 17 | rs4525537  | 41268504 | C | 0.18 | 0.23 | 0.03 | 0.76 | 0.68 | 0.86 | 6.6E-6 | 0.18 | 0.23 | 0.08 | 0.72 | 0.60 | 0.86 | 2.4E-4 | 0.18 | 0.23 | 0.39 | 0.28 | 0.75 | 0.69 | 0.83 | 4.0E-9 |
| 17 | rs4640231  | 41268567 | C | 0.18 | 0.23 | 0.02 | 0.76 | 0.68 | 0.86 | 6.4E-6 | 0.18 | 0.23 | 0.08 | 0.72 | 0.60 | 0.86 | 2.4E-4 | 0.18 | 0.23 | 0.39 | 0.29 | 0.75 | 0.68 | 0.83 | 3.8E-9 |
| 17 | rs10445364 | 41272136 | A | 0.18 | 0.23 | 0.02 | 0.76 | 0.68 | 0.86 | 6.9E-6 | 0.18 | 0.23 | 0.08 | 0.72 | 0.60 | 0.86 | 2.4E-4 | 0.18 | 0.23 | 0.39 | 0.29 | 0.75 | 0.69 | 0.83 | 4.2E-9 |
| 17 | rs17763596 | 41276990 | T | 0.18 | 0.23 | 0.03 | 0.76 | 0.68 | 0.86 | 7.4E-6 | 0.18 | 0.23 | 0.08 | 0.72 | 0.60 | 0.86 | 2.4E-4 | 0.18 | 0.23 | 0.39 | 0.28 | 0.75 | 0.69 | 0.83 | 4.5E-9 |
| 17 | 41279046   | 41279046 | A | 0.18 | 0.23 | 0.03 | 0.77 | 0.68 | 0.86 | 8.7E-6 | 0.18 | 0.23 | 0.08 | 0.72 | 0.60 | 0.86 | 2.4E-4 | 0.18 | 0.23 | 0.42 | 0.28 | 0.76 | 0.69 | 0.83 | 5.5E-9 |
| 17 | rs12185233 | 41279434 | C | 0.18 | 0.23 | 0.03 | 0.76 | 0.68 | 0.86 | 7.0E-6 | 0.18 | 0.23 | 0.08 | 0.72 | 0.60 | 0.86 | 2.4E-4 | 0.18 | 0.23 | 0.45 | 0.29 | 0.75 | 0.68 | 0.83 | 3.7E-9 |
| 17 | rs12185235 | 41279483 | T | 0.18 | 0.23 | 0.02 | 0.76 | 0.68 | 0.86 | 5.9E-6 | 0.18 | 0.23 | 0.08 | 0.72 | 0.60 | 0.86 | 2.4E-4 | 0.18 | 0.23 | 0.37 | 0.29 | 0.75 | 0.68 | 0.83 | 3.6E-9 |
| 17 | rs12373123 | 41279853 | C | 0.18 | 0.23 | 0.02 | 0.76 | 0.68 | 0.86 | 5.5E-6 | 0.18 | 0.23 | 0.08 | 0.72 | 0.60 | 0.86 | 2.4E-4 | 0.18 | 0.23 | 0.39 | 0.30 | 0.75 | 0.68 | 0.83 | 3.4E-9 |
| 17 | 41279910   | 41279910 | A | 0.18 | 0.23 | 0.02 | 0.76 | 0.68 | 0.86 | 6.0E-6 | 0.18 | 0.23 | 0.08 | 0.72 | 0.60 | 0.86 | 2.4E-4 | 0.18 | 0.23 | 0.37 | 0.28 | 0.75 | 0.68 | 0.83 | 3.5E-9 |
| 17 | rs12373142 | 41279980 | G | 0.18 | 0.23 | 0.02 | 0.76 | 0.68 | 0.86 | 5.5E-6 | 0.18 | 0.23 | 0.08 | 0.72 | 0.60 | 0.86 | 2.4E-4 | 0.18 | 0.23 | 0.37 | 0.29 | 0.75 | 0.68 | 0.83 | 3.5E-9 |
| 17 | 41306766   | 41306766 | T | 0.19 | 0.23 | 0.06 | 0.76 | 0.68 | 0.85 | 3.7E-6 | 0.18 | 0.23 | 0.08 | 0.71 | 0.60 | 0.85 | 1.9E-4 | 0.18 | 0.23 | 0.56 | 0.25 | 0.75 | 0.68 | 0.82 | 1.8E-9 |
| 17 | rs17770343 | 41325948 | C | 0.18 | 0.23 | 0.03 | 0.77 | 0.68 | 0.86 | 8.8E-6 | 0.18 | 0.23 | 0.08 | 0.71 | 0.60 | 0.85 | 1.9E-4 | 0.18 | 0.23 | 0.39 | 0.27 | 0.75 | 0.69 | 0.83 | 4.7E-9 |
| 17 | rs17691610 | 41326456 | T | 0.18 | 0.23 | 0.04 | 0.77 | 0.68 | 0.86 | 8.4E-6 | 0.18 | 0.23 | 0.08 | 0.71 | 0.60 | 0.85 | 1.9E-4 | 0.18 | 0.23 | 0.49 | 0.29 | 0.75 | 0.68 | 0.83 | 4.2E-9 |
| 17 | 41367654   | 41367654 | C | 0.18 | 0.23 | 0.04 | 0.76 | 0.68 | 0.86 | 7.0E-6 | 0.18 | 0.23 | 0.08 | 0.71 | 0.60 | 0.85 | 1.9E-4 | 0.18 | 0.23 | 0.46 | 0.25 | 0.75 | 0.68 | 0.83 | 3.6E-9 |
| 17 | rs17650901 | 41395527 | G | 0.18 | 0.23 | 0.03 | 0.76 | 0.68 | 0.86 | 5.6E-6 | 0.18 | 0.23 | 0.08 | 0.71 | 0.60 | 0.85 | 1.9E-4 | 0.18 | 0.23 | 0.39 | 0.26 | 0.75 | 0.68 | 0.83 | 2.7E-9 |
| 17 | rs1800547  | 41407682 | G | 0.18 | 0.23 | 0.03 | 0.76 | 0.68 | 0.86 | 6.8E-6 | 0.18 | 0.23 | 0.08 | 0.71 | 0.60 | 0.85 | 1.9E-4 | 0.18 | 0.23 | 0.42 | 0.24 | 0.75 | 0.68 | 0.83 | 3.4E-9 |
| 17 | 41416612   | 41416612 | T | 0.18 | 0.23 | 0.03 | 0.76 | 0.68 | 0.86 | 7.3E-6 | 0.18 | 0.23 | 0.08 | 0.71 | 0.60 | 0.85 | 1.9E-4 | 0.18 | 0.23 | 0.42 | 0.24 | 0.75 | 0.68 | 0.83 | 3.1E-9 |
| 17 | rs17651549 | 41417115 | T | 0.18 | 0.23 | 0.03 | 0.76 | 0.68 | 0.86 | 4.8E-6 | 0.18 | 0.23 | 0.08 | 0.71 | 0.60 | 0.85 | 1.9E-4 | 0.18 | 0.23 | 0.39 | 0.23 | 0.75 | 0.68 | 0.82 | 2.2E-9 |
| 17 | rs10445337 | 41423237 | C | 0.18 | 0.23 | 0.04 | 0.76 | 0.68 | 0.86 | 5.9E-6 | 0.18 | 0.23 | 0.08 | 0.72 | 0.60 | 0.86 | 2.4E-4 | 0.18 | 0.23 | 0.49 | 0.24 | 0.75 | 0.68 | 0.83 | 3.2E-9 |
| 17 | rs10445338 | 41423519 | A | 0.18 | 0.23 | 0.03 | 0.76 | 0.68 | 0.86 | 6.8E-6 | 0.18 | 0.23 | 0.08 | 0.71 | 0.60 | 0.85 | 1.9E-4 | 0.18 | 0.23 | 0.42 | 0.24 | 0.75 | 0.68 | 0.83 | 3.4E-9 |
| 17 | rs1052551  | 41424761 | A | 0.18 | 0.23 | 0.03 | 0.76 | 0.68 | 0.86 | 6.0E-6 | 0.18 | 0.23 | 0.08 | 0.71 | 0.60 | 0.85 | 1.9E-4 | 0.18 | 0.23 | 0.42 | 0.23 | 0.75 | 0.68 | 0.83 | 3.0E-9 |
| 17 | rs17573175 | 41426926 | G | 0.18 | 0.23 | 0.03 | 0.76 | 0.68 | 0.86 | 6.6E-6 | 0.18 | 0.23 | 0.08 | 0.71 | 0.60 | 0.85 | 1.9E-4 | 0.18 | 0.23 | 0.42 | 0.25 | 0.75 | 0.68 | 0.83 | 3.3E-9 |
| 17 | rs1052553  | 41429726 | G | 0.18 | 0.23 | 0.03 | 0.76 | 0.68 | 0.86 | 6.7E-6 | 0.18 | 0.23 | 0.08 | 0.71 | 0.60 | 0.85 | 1.9E-4 | 0.18 | 0.23 | 0.42 | 0.26 | 0.75 | 0.68 | 0.83 | 3.3E-9 |
| 17 | rs17652121 | 41429810 | C | 0.18 | 0.23 | 0.03 | 0.76 | 0.68 | 0.86 | 6.8E-6 | 0.18 | 0.23 | 0.08 | 0.71 | 0.60 | 0.85 | 1.9E-4 | 0.18 | 0.23 | 0.42 | 0.24 | 0.75 | 0.68 | 0.83 | 3.4E-9 |
| 17 | rs1078268  | 41431738 | C | 0.18 | 0.23 | 0.03 | 0.76 | 0.68 | 0.86 | 6.4E-6 | 0.18 | 0.23 | 0.08 | 0.71 | 0.60 | 0.85 | 1.9E-4 | 0.18 | 0.23 | 0.42 | 0.23 | 0.75 | 0.68 | 0.83 | 3.1E-9 |
| 17 | rs17573509 | 41437061 | A | 0.18 | 0.23 | 0.03 | 0.76 | 0.68 | 0.86 | 6.0E-6 | 0.18 | 0.23 | 0.08 | 0.71 | 0.60 | 0.85 | 1.9E-4 | 0.18 | 0.23 | 0.42 | 0.23 | 0.75 | 0.68 | 0.83 | 3.0E-9 |
| 17 | rs1052587  | 41458449 | C | 0.18 | 0.23 | 0.03 | 0.76 | 0.68 | 0.86 | 5.4E-6 | 0.18 | 0.23 | 0.08 | 0.71 | 0.60 | 0.85 | 1.9E-4 | 0.18 | 0.23 | 0.42 | 0.24 | 0.75 | 0.68 | 0.83 | 2.6E-9 |
| 17 | rs17574040 | 41458711 | C | 0.18 | 0.23 | 0.03 | 0.76 | 0.68 | 0.86 | 7.0E-6 | 0.18 | 0.23 | 0.08 | 0.71 | 0.60 | 0.85 | 1.9E-4 | 0.18 | 0.23 | 0.42 | 0.23 | 0.75 | 0.68 | 0.83 | 3.5E-9 |
| 17 | rs16940799 | 41458779 | C | 0.18 | 0.23 | 0.03 | 0.77 | 0.68 | 0.86 | 7.8E-6 | 0.18 | 0.23 | 0.08 | 0.71 | 0.60 | 0.85 | 1.9E-4 | 0.18 | 0.23 | 0.37 | 0.25 | 0.75 | 0.69 | 0.83 | 4.1E-9 |
| 17 | rs2158257  | 41460189 | G | 0.18 | 0.23 | 0.03 | 0.76 | 0.68 | 0.86 | 6.8E-6 | 0.18 | 0.23 | 0.08 | 0.71 | 0.60 | 0.85 | 1.9E-4 | 0.18 | 0.23 | 0.42 | 0.24 | 0.75 | 0.68 | 0.83 | 3.4E-9 |
| 17 | rs17574228 | 41460355 | C | 0.18 | 0.23 | 0.03 | 0.76 | 0.68 | 0.86 | 6.8E-6 | 0.18 | 0.23 | 0.08 | 0.71 | 0.60 | 0.85 | 1.9E-4 | 0.18 | 0.23 | 0.42 | 0.24 | 0.75 | 0.68 | 0.83 | 3.4E-9 |
| 17 | rs7350928  | 41463947 | T | 0.18 | 0.23 | 0.03 | 0.76 | 0.68 | 0.86 | 7.3E-6 | 0.18 | 0.23 | 0.08 | 0.71 | 0.60 | 0.85 | 2.1E-4 | 0.18 | 0.23 | 0.42 | 0.23 | 0.75 | 0.69 | 0.83 | 4.0E-9 |
| 17 | rs17574361 | 41464049 | G | 0.18 | 0.23 | 0.03 | 0.76 | 0.68 | 0.86 | 7.2E-6 | 0.18 | 0.23 | 0.08 | 0.71 | 0.60 | 0.85 | 1.9E-4 | 0.18 | 0.23 | 0.42 | 0.23 | 0.75 | 0.68 | 0.83 | 3.5E-9 |
| 17 | 1464753    | 41464753 | G | 0.18 | 0.23 | 0.03 | 0.76 | 0.68 | 0.86 | 7.1E-6 | 0.18 | 0.23 | 0.08 | 0.71 | 0.60 | 0.85 | 1.9E-4 | 0.18 | 0.23 | 0.42 | 0.23 | 0.75 | 0.68 | 0.83 | 3.5E-9 |
| 17 | rs36076725 | 41466379 | A | 0.18 | 0.23 | 0.03 | 0.76 | 0.68 | 0.86 | 6.5E-6 | 0.18 | 0.23 | 0.08 | 0.71 | 0.60 | 0.85 | 2.1E-4 | 0.18 | 0.23 | 0.39 | 0.24 | 0.75 | 0.68 | 0.83 | 3.5E-9 |
| 17 | rs35833914 | 41466388 | A | 0.18 | 0.23 | 0.03 | 0.77 | 0.68 | 0.86 | 7.7E-6 | 0.18 | 0.23 | 0.08 | 0.71 | 0.60 | 0.85 | 2.1E-4 | 0.18 | 0.23 | 0.42 | 0.23 | 0.75 | 0.69 | 0.83 | 4.1E-9 |
| 17 | rs17574604 | 41467460 | G | 0.18 | 0.23 | 0.03 | 0.76 | 0.68 | 0.86 | 7.2E-6 | 0.18 | 0.23 | 0.08 | 0.71 | 0.60 | 0.85 | 2.1E-4 | 0.18 | 0.23 | 0.42 | 0.23 | 0.75 | 0.69 | 0.83 | 3.9E-9 |
| 17 | 41472966   | 41472966 | G | 0.18 | 0.23 | 0.03 | 0.76 | 0.68 | 0.86 | 6.8E-6 | 0.18 | 0.23 | 0.08 | 0.71 | 0.60 | 0.85 | 2.1E-4 | 0.18 | 0.23 | 0.42 | 0.24 | 0.75 | 0.68 | 0.83 | 3.6E-9 |
| 17 | rs17576165 | 41515668 | C | 0.18 | 0.23 | 0.03 | 0.76 | 0.68 | 0.86 | 7.1E-6 | 0.18 | 0.23 | 0.08 | 0.71 | 0.60 | 0.85 | 2.1E-4 | 0.18 | 0.23 | 0.42 | 0.25 | 0.75 | 0.68 | 0.83 | 3.7E-9 |
| 17 | rs2532274  | 41602941 | C | 0.19 | 0.23 | 0.02 | 0.77 | 0.68 | 0.86 | 6.9E-6 | 0.18 | 0.23 | 0.08 | 0.71 | 0.60 | 0.85 | 2.0E-4 | 0.19 | 0.23 | 0.37 | 0.19 | 0.76 | 0.69 | 0.83 | 5.6E-9 |
| 17 | rs1881194  | 41604591 | A | 0.18 | 0.23 | 0.03 | 0.77 | 0.68 | 0.86 | 8.4E-6 | 0.18 | 0.23 | 0.08 | 0.71 | 0.60 | 0.85 | 2.2E-4 | 0.18 | 0.23 | 0.37 | 0.27 | 0.75 | 0.69 | 0.83 | 5.0E-9 |
| 17 | rs2957316  | 41686991 | G | 0.18 | 0.23 | 0.03 | 0.77 | 0.68 | 0.86 | 9.7E-6 | 0.18 | 0.23 | 0.10 | 0.72 | 0.60 | 0.86 | 2.3E-4 | 0.18 | 0.23 | 0.39 | 0.23 | 0.76 | 0.69 | 0.83 | 6.4E-9 |
| 17 | rs199454   | 42155294 | G | 0.20 | 0.25 | 0.44 | 0.77 | 0.69 | 0.87 | 8.0E-6 | 0.17 | 0.21 | 0.04 | 0.74 | 0.62 | 0.90 | 1.7E-3 | 0.19 | 0.24 | 0.64 | 0.56 | 0.77 | 0.70 | 0.85 | 4.0E-8 |
| 17 | rs199528   | 42198305 | T | 0.17 | 0.22 | 0.05 | 0.74 | 0.66 | 0.84 | 1.4E-6 | 0.16 | 0.20 | 0.67 | 0.77 | 0.63 | 0.93 | 0.01   | 0.17 | 0.21 | 0.16 | 0.55 | 0.76 | 0.69 | 0.84 | 2.7E-8 |
| 17 | rs415430   | 42214305 | G | 0.17 | 0.22 | 0.09 | 0.75 | 0.67 | 0.85 | 2.7E-6 | 0.16 | 0.20 | 0.67 | 0.77 | 0.63 | 0.93 | 0.01   | 0.17 | 0.21 | 0.22 | 0.46 | 0.77 | 0.69 | 0.84 | 6.3E-8 |

CHR-17 SNPs in the 41070 - 41605 KB region are in high LD ( $R^2 \sim 1$ ) and have the same MAF in NGRC, in CIDR, as well as in CEU-HapMap data.

### Supplementary Table 4. Replication of other GWAS

We imputed the SNPs that were not genotyped (shown in Italics). If imputed call rate was <95%, data were not used (blank cells).

#### (a) Pankratz et al.<sup>1</sup>

| CHR | GENE                         | SNP        | Pankratz et al. |         |      |        | NGRC        |             |             |               | Individual-level Meta-analysis |         |         |      |          |
|-----|------------------------------|------------|-----------------|---------|------|--------|-------------|-------------|-------------|---------------|--------------------------------|---------|---------|------|----------|
|     |                              |            | MAF             |         | OR   | P      | MAF         |             | OR          | P             | MAF                            |         | P<br>BD | OR   | P<br>CMH |
|     |                              |            | Case            | Control |      |        | Case        | Control     |             |               | Case                           | Control |         |      |          |
| 4   | <i>GAK/DGKQ</i>              | rs1564282  | 0.13            | 0.09    | 1.70 | 6.0E-6 | <i>0.12</i> | <i>0.09</i> | 1.32        | <i>4.1E-4</i> | 0.12                           | 0.09    | 0.39    | 1.45 | 8.3E-9   |
| 4   |                              | rs11248051 | 0.13            | 0.09    | 1.70 | 5.2E-6 | 0.12        | 0.09        | 1.32        | 3.1E-4        | 0.12                           | 0.09    | 0.39    | 1.46 | 3.2E-9   |
| 4   |                              | rs11248060 | 0.15            | 0.10    | 1.69 | 3.4E-6 | 0.13        | 0.11        | 1.23        | 5.2E-3        | 0.14                           | 0.10    | 0.19    | 1.36 | 2.9E-7   |
| 20  | <i>COX6CP2/PTPN1</i>         | rs4811072  | 0.29            | 0.24    | 1.40 | 6.5E-5 | 0.26        | 0.26        | 0.99        | 0.82          | 0.27                           | 0.25    | 0.01    | 1.09 | 0.04     |
| 20  |                              | rs1997791  | 0.30            | 0.24    | 1.43 | 1.9E-5 |             |             |             |               |                                |         |         |      |          |
| 4   | <i>LOC729075</i>             | rs2654735  | 0.39            | 0.46    | 0.75 | 9.0E-5 | 0.44        | 0.43        | 1.04        | 0.46          | 0.43                           | 0.44    | 6.3E-4  | 0.94 | 0.12     |
| 4   |                              | rs1806506  | 0.39            | 0.46    | 0.74 | 3.7E-5 | 0.43        | 0.42        | 1.04        | 0.38          | 0.42                           | 0.43    | 2.5E-4  | 0.94 | 0.12     |
| 4   |                              | rs11729080 | 0.14            | 0.19    | 0.66 | 3.3E-5 |             |             |             |               |                                |         |         |      |          |
| 8   | <i>LOC727725/ZMAT4</i>       | rs4736788  | 0.22            | 0.28    | 0.70 | 4.9E-5 | <i>0.23</i> | <i>0.23</i> | <i>0.96</i> | <i>0.49</i>   | 0.22                           | 0.24    | 0.06    | 0.88 | 0.01     |
| 8   |                              | rs10094981 | 0.22            | 0.28    | 0.70 | 4.8E-5 | <i>0.23</i> | <i>0.23</i> | <i>0.96</i> | <i>0.49</i>   | 0.22                           | 0.25    | 0.07    | 0.88 | 0.01     |
| 17  | <i>HRNBP3</i>                | rs898528   | 0.30            | 0.37    | 0.74 | 4.9E-5 | 0.32        | 0.32        | 0.98        | 0.73          | 0.31                           | 0.34    | 1.0E-4  | 0.90 | 0.01     |
| 13  | <i>LAMP1</i>                 | rs12871648 | 0.38            | 0.32    | 1.36 | 5.0E-5 | 0.35        | 0.34        | 1.06        | 0.28          | 0.36                           | 0.33    | 0.02    | 1.12 | 4.5E-3   |
| 2   | <i>LTBP1</i>                 | rs4670322  | 0.32            | 0.26    | 1.38 | 5.1E-5 | 0.31        | 0.31        | 1.03        | 0.56          | 0.32                           | 0.30    | 1.5E-3  | 1.10 | 0.02     |
| 10  | Gene desert                  | rs11592212 | 0.09            | 0.05    | 1.80 | 5.2E-5 | <i>0.05</i> | <i>0.06</i> | <i>0.86</i> | <i>0.14</i>   | 0.06                           | 0.06    | 6.6E-4  | 1.12 | 0.18     |
| 4   | <i>SNCA/GPRIN3/MMRNI</i>     | rs4106153  | 0.17            | 0.22    | 0.70 | 9.2E-5 |             |             |             |               |                                |         |         |      |          |
| 4   |                              | rs1504489  | 0.36            | 0.42    | 0.75 | 8.4E-5 | <i>0.41</i> | <i>0.40</i> | <i>1.04</i> | <i>0.48</i>   | 0.40                           | 0.41    | 0.01    | 0.94 | 0.12     |
| 4   |                              | rs356229   | 0.44            | 0.37    | 1.35 | 5.5E-5 |             |             |             |               |                                |         |         |      |          |
| 4   |                              | rs356188   | 0.18            | 0.23    | 0.70 | 8.4E-5 | <i>0.18</i> | <i>0.21</i> | <i>0.80</i> | <i>1.6E-4</i> | 0.18                           | 0.21    | 0.60    | 0.79 | 2.4E-6   |
| 4   |                              | rs3775478  | 0.10            | 0.07    | 1.69 | 6.1E-5 | 0.10        | 0.08        | 1.26        | 0.01          | 0.10                           | 0.08    | 0.04    | 1.36 | 7.8E-6   |
| 6   | <i>PRDM13/MCHR2</i>          | rs4431442  | 0.32            | 0.26    | 1.39 | 5.6E-5 | 0.30        | 0.29        | 1.02        | 0.75          | 0.31                           | 0.28    | 0.01    | 1.11 | 0.01     |
| 6   |                              | rs10937194 | 0.19            | 0.24    | 0.70 | 5.9E-5 |             |             |             |               |                                |         |         |      |          |
| 14  | <i>CGRRF1/SAMD4A</i>         | rs4901519  | 0.12            | 0.15    | 0.65 | 7.6E-5 | <i>0.13</i> | <i>0.13</i> | <i>1.03</i> | <i>0.70</i>   | 0.13                           | 0.14    | 0.02    | 0.91 | 0.11     |
| 17  | <i>C17orf69/PLEKHM1/MAPT</i> | rs11012    | 0.14            | 0.20    | 0.68 | 8.8E-5 | 0.15        | 0.19        | 0.77        | 7.3E-5        | 0.15                           | 0.19    | 0.25    | 0.75 | 3.0E-8   |
| 17  |                              | rs1724425  | 0.39            | 0.45    | 0.75 | 7.8E-5 |             |             |             |               |                                |         |         |      |          |
| 3   | <i>LEKR1</i>                 | rs12638253 | 0.45            | 0.52    | 0.75 | 8.3E-5 | <i>0.47</i> | <i>0.48</i> | <i>1.01</i> | <i>0.81</i>   | 0.47                           | 0.49    | 3.3E-3  | 0.92 | 0.03     |
| 7   | <i>POU6F2</i>                | rs9655034  | 0.48            | 0.41    | 1.33 | 8.8E-5 | 0.47        | 0.47        | 1.00        | 0.96          | 0.47                           | 0.45    | 3.3E-3  | 1.08 | 0.05     |
| 3   | <i>TMEM108</i>               | rs1197313  | 0.39            | 0.45    | 0.75 | 8.9E-5 | 0.41        | 0.42        | 0.98        | 0.74          | 0.41                           | 0.43    | 0.04    | 0.92 | 0.04     |
| 12  | <i>LOC728328/PCTK2</i>       | rs7312607  | 0.49            | 0.43    | 1.33 | 9.3E-5 | 0.46        | 0.47        | 0.95        | 0.32          | 0.48                           | 0.43    | 0.01    | 1.04 | 0.29     |
| 3   | <i>FGF12</i>                 | rs9859577  | 0.13            | 0.17    | 0.67 | 9.9E-5 | 0.16        | 0.16        | 1.03        | 0.70          | 0.15                           | 0.16    | 1.0E-3  | 0.90 | 0.04     |
| 12  | <i>LOC652429/TMEM132B</i>    | rs2108521  | 0.22            | 0.27    | 0.72 | 1.0E-4 | <i>0.27</i> | <i>0.27</i> | <i>0.95</i> | <i>0.36</i>   | 0.25                           | 0.27    | 0.03    | 0.88 | 0.01     |

**(b) Satake et al.<sup>2</sup> and Simon-Sanchez et al.<sup>3</sup>**

Three loci were reported by Satake et al as being PD risk factors in the Japanese, and were followed-up by Simon-Sanchez et al. in a Caucasian sample. We show Satake's results for "GWAS + Replication 1+2" and Simon-Sanchez's results for "Stage I+II". We used individual level data and the CMH method for Meta-analysis when combining Pankratz and NGRC data (all scenarios except *BST1* rs4698412). When combining Simon-Sanchez with NGRC, we used Aggregate Meta-analysis and Random Effects model (rs4698412). We used the same allele as Satake et al, which was at times not the minor allele in Caucasians, to keep risk allele consistent. We did not perform Meta-analysis with Satake data due to heterogeneity between Caucasians and Japanese. We did not combine Simon-Sanchez and Pankratz data because they used the same ~800 NINDS controls.

| locus                 | SNP        | Satake    |           |      |         | Simon-Sanchez |         |        |        | Pankratz |         |      |      | NGRC |         |      |      | Meta-Analysis |        |  |
|-----------------------|------------|-----------|-----------|------|---------|---------------|---------|--------|--------|----------|---------|------|------|------|---------|------|------|---------------|--------|--|
|                       |            | MAF       |           | OR   | P       | MAF           |         | OR     | P      | MAF      |         | OR   | P    | MAF  |         | OR   | P    |               |        |  |
|                       |            | case      | control   |      |         | case          | control |        |        | case     | control |      |      | case | control |      |      |               |        |  |
| 1q32<br><i>PARK16</i> | rs16856139 | 0.10-0.11 | 0.13-0.14 | 1.36 | 1.02E-7 |               |         |        |        |          |         |      |      |      |         |      |      |               |        |  |
|                       | rs823128   | 0.09-0.11 | 0.13-0.14 | 1.41 | 4.9E-9  | 0.03          | 0.04    | 0.66   | 7.3E-8 | 0.01     | 0.01    | 1.08 | 0.85 | 0.03 | 0.03    | 0.82 | 0.15 | 0.94          | 0.61   |  |
|                       | rs823122   | 0.09-0.11 | 0.13-0.14 | 1.37 | 5.2E-8  |               |         |        |        |          |         |      |      | 0.05 | 0.06    | 0.83 | 0.08 | 0.97          | 0.72   |  |
|                       | rs947211   | 0.42-0.43 | 0.48-0.50 | 1.30 | 1.5E-12 |               |         |        |        | 0.23     | 0.24    | 0.96 | 0.63 | 0.23 | 0.24    | 0.88 | 0.03 | 0.91          | 0.04   |  |
|                       | rs823156   | 0.12-0.14 | 0.17-0.17 | 1.37 | 3.6E-9  | 0.16          | 0.18    | 0.89   | 7.6E-4 |          |         |      |      | 0.16 | 0.17    | 0.90 | 0.08 |               |        |  |
|                       | rs708730   | 0.12-0.15 | 0.17-0.18 | 1.33 | 2.4E-8  |               |         |        |        | 0.17     | 0.17    | 0.98 | 0.82 | 0.16 | 0.17    | 0.87 | 0.03 | 0.92          | 0.11   |  |
|                       | rs11240572 | 0.12-0.13 | 0.16-0.17 | 1.33 | 1.1E-7  | 0.03          | 0.04    | 0.67   | 6.1E-7 |          |         |      |      |      |         |      |      |               |        |  |
| 4p15<br><i>BST1</i>   | rs11931532 | 0.45-0.47 | 0.40-0.42 | 1.24 | 5.1E-9  |               |         |        |        | 0.98     | 0.98    | 0.94 | 0.81 | 0.97 | 0.97    | 1.03 | 0.84 | 1.02          | 0.89   |  |
|                       | rs12645693 | 0.45-0.47 | 0.40-0.42 | 1.24 | 8.7E-9  |               |         |        |        | 0.98     | 0.98    | 0.94 | 0.81 | 0.97 | 0.97    | 1.05 | 0.74 | 1.00          | 0.99   |  |
|                       | rs4698412  | 0.38-0.40 | 0.33-0.35 | 1.24 | 1.8E-8  | 0.57          | 0.56    | 1.06   | 3.0E-2 |          |         |      |      | 0.58 | 0.55    | 1.13 | 0.01 | 1.08          | 1.5E-3 |  |
|                       | rs4538475  | 0.41-0.43 | 0.36-0.38 | 1.24 | 3.9E-9  |               |         |        |        | 0.85     | 0.83    | 1.19 | 0.09 | 0.85 | 0.83    | 1.10 | 0.14 | 0.89          | 0.02   |  |
|                       | rs12646913 |           |           |      |         | 0.07          | 0.08    | 0.92   | 3.0E-2 | 0.08     | 0.09    | 0.86 | 0.26 | 0.07 | 0.08    | 0.78 | 0.01 | 0.81          | 3.6E-3 |  |
|                       | rs12502586 |           |           |      |         | 0.11          | 0.10    | 1.08   | 0.07   |          |         |      |      |      |         |      |      |               |        |  |
| 12q12<br><i>LRRK2</i> | rs1994090  | 0.10-0.12 | 0.08-0.08 | 1.39 | 2.7E-8  |               |         |        |        | 0.23     | 0.21    | 1.16 | 0.10 | 0.23 | 0.21    | 1.12 | 0.05 | 1.13          | 0.01   |  |
|                       | rs7304279  | 0.10-0.12 | 0.08-0.09 | 1.38 | 5.1E-8  |               |         |        |        | 0.17     | 0.15    | 1.22 | 0.05 | 0.16 | 0.14    | 1.15 | 0.04 | 1.17          | 4.6E-3 |  |
|                       | rs4768212  | 0.10-0.12 | 0.07-0.08 | 1.37 | 1.1E-7  |               |         |        |        | 0.07     | 0.07    | 1.07 | 0.64 | 0.07 | 0.07    | 1.11 | 0.25 | 1.09          | 0.26   |  |
|                       | rs2708453  | 0.10-0.13 | 0.08-0.08 | 1.38 | 9.7E-8  |               |         |        |        | 0.17     | 0.15    | 1.21 | 0.05 | 0.17 | 0.15    | 1.15 | 0.03 | 1.17          | 3.9E-3 |  |
|                       | rs2046932  | 0.10-0.13 | 0.08-0.09 | 1.39 | 4.3E-8  |               |         |        |        |          |         |      |      |      |         |      |      |               |        |  |
|                       | rs11564162 |           |           |      |         | 0.19          | 0.21    | 0.87   | 9.5E-5 |          |         |      |      |      |         |      |      |               |        |  |
|                       | rs2896905  |           |           |      |         | 0.37          | 0.39    | 0.93   | 7.8E-3 | 0.37     | 0.38    | 0.94 | 0.38 | 0.38 | 0.39    | 0.97 | 0.57 | 0.96          | 0.26   |  |
| rs1491923             |            |           |           |      | 0.33    | 0.31          | 1.14    | 1.6E-5 | 0.33   | 0.32     | 1.01    | 0.88 | 0.33 | 0.33 | 1.02    | 0.69 | 1.02 | 0.67          |        |  |



**Supplementary Table 5. HLA, PC1 and PD. (also see Supplementary Figures 5 and 6)**

We used multiple logistic regression to study the independence of PD-associated SNP at *HLA-DRA* (rs3129882) with *HLA* SNPs that were associated with PC1 in three different ways (a-c).

**(a)** Tests of association of 50 most significant PC1-associated SNPs with PD adjusting for rs3129882 (columns 8 & 9) and of rs3129882 with PD adjusting for each of the top 50 PC1-SNPs (10 & 11). The model was  $Dis \sim age + gender + PC1 + PC2 + rs3129882 + PC1-SNP$ . Association of rs3129882 with PD remained strong when adjusted for PC1 SNPs. However, association of PC1 SNPs with PD was not significant after adjusting for rs3129882. The *HLA* association with PD is therefore driven by rs3129882, not PC1-associated SNPs.

| Ch 6<br>VARIANTS | SNP        | A1 | Position  | MAF<br>Case | MAF<br>Control | HWE    | Assoc of PC1-SNPs<br>with PD adj for<br>rs3129882, sex, age,<br>PC1,PC2 |      | Assoc of<br>rs3129882 with PD, adj<br>for PC1-SNPs, sex,<br>age, PC1,PC2 |        |
|------------------|------------|----|-----------|-------------|----------------|--------|-------------------------------------------------------------------------|------|--------------------------------------------------------------------------|--------|
|                  |            |    |           |             |                |        | OR                                                                      | P    | OR                                                                       | P      |
| <i>HLA-DRA</i>   | rs3129882  | G  | 32517508  | 0.46        | 0.40           | 1.00   |                                                                         |      |                                                                          |        |
|                  | rs10456405 | G  | 32320845  | 0.18        | 0.15           | 0.29   | 1.13                                                                    | 0.06 | 1.29                                                                     | 1.2E-7 |
|                  | rs11751445 | A  | 29575831  | 0.02        | 0.01           | 1.00   | 0.86                                                                    | 0.44 | 1.31                                                                     | 3.2E-8 |
|                  | rs11753208 | T  | 31113411  | 0.08        | 0.07           | 0.29   | 0.96                                                                    | 0.68 | 1.31                                                                     | 2.8E-8 |
|                  | rs11756938 | T  | 29564633  | 0.02        | 0.01           | 1.00   | 0.85                                                                    | 0.40 | 1.31                                                                     | 3.1E-8 |
|                  | rs11758964 | C  | 31554345  | 0.06        | 0.06           | 1.00   | 0.80                                                                    | 0.04 | 1.32                                                                     | 1.5E-8 |
|                  | rs13194642 | T  | 32319673  | 0.16        | 0.12           | 0.01   | 1.14                                                                    | 0.06 | 1.29                                                                     | 3.2E-7 |
|                  | rs17200407 | G  | 31497944  | 0.02        | 0.02           | 1.00   | 0.69                                                                    | 0.06 | 1.32                                                                     | 1.3E-8 |
|                  | rs1724770  | G  | 117708667 | 0.01        | 0.01           | 1.00   | 1.20                                                                    | 0.45 | 1.31                                                                     | 2.9E-8 |
|                  | rs2244020  | C  | 31455430  | 0.37        | 0.39           | 0.53   | 0.90                                                                    | 0.03 | 1.30                                                                     | 6.7E-8 |
|                  | rs2517474  | T  | 31154473  | 0.50        | 0.48           | 0.16   | 1.03                                                                    | 0.57 | 1.31                                                                     | 3.1E-8 |
|                  | rs2517506  | G  | 31139659  | 0.17        | 0.15           | 0.20   | 1.03                                                                    | 0.63 | 1.31                                                                     | 3.2E-8 |
|                  | rs2517518  | A  | 31136324  | 0.17        | 0.15           | 0.19   | 1.02                                                                    | 0.75 | 1.31                                                                     | 2.9E-8 |
|                  | rs2523840  | T  | 31138404  | 0.17        | 0.15           | 0.19   | 1.02                                                                    | 0.75 | 1.31                                                                     | 3.2E-8 |
|                  | rs2523841  | T  | 31138262  | 0.17        | 0.15           | 0.19   | 1.02                                                                    | 0.76 | 1.31                                                                     | 2.9E-8 |
|                  | rs2523845  | G  | 31135372  | 0.17        | 0.15           | 0.19   | 1.02                                                                    | 0.80 | 1.30                                                                     | 4.0E-8 |
|                  | rs2523848  | T  | 31133083  | 0.17        | 0.15           | 0.20   | 1.03                                                                    | 0.63 | 1.31                                                                     | 3.2E-8 |
|                  | rs2523849  | G  | 31133030  | 0.17        | 0.15           | 0.20   | 1.03                                                                    | 0.63 | 1.31                                                                     | 3.2E-8 |
|                  | rs2523850  | A  | 31132727  | 0.17        | 0.15           | 0.20   | 1.03                                                                    | 0.64 | 1.31                                                                     | 3.1E-8 |
|                  | rs2523882  | A  | 31150196  | 0.30        | 0.29           | 0.58   | 1.01                                                                    | 0.81 | 1.31                                                                     | 3.2E-8 |
|                  | rs2849016  | G  | 32317240  | 0.24        | 0.20           | 2.4E-4 | 1.11                                                                    | 0.08 | 1.27                                                                     | 1.6E-6 |
|                  | rs371156   | G  | 32317941  | 0.28        | 0.25           | 0.01   | 1.06                                                                    | 0.30 | 1.29                                                                     | 1.9E-7 |
|                  | rs376549   | G  | 32316675  | 0.40        | 0.37           | 0.47   | 1.09                                                                    | 0.07 | 1.32                                                                     | 1.5E-8 |
|                  | rs377743   | T  | 32319043  | 0.27        | 0.24           | 3.8E-3 | 1.04                                                                    | 0.47 | 1.30                                                                     | 1.1E-7 |
|                  | rs380571   | G  | 32317540  | 0.24        | 0.20           | 2.4E-4 | 1.11                                                                    | 0.09 | 1.28                                                                     | 1.4E-6 |
|                  | rs382259   | G  | 32317005  | 0.28        | 0.25           | 0.01   | 1.06                                                                    | 0.29 | 1.29                                                                     | 2.2E-7 |
|                  | rs412657   | C  | 32319063  | 0.43        | 0.40           | 1.00   | 1.07                                                                    | 0.16 | 1.30                                                                     | 4.5E-8 |
|                  | rs41271257 | A  | 35544173  | 0.03        | 0.02           | 0.09   | 1.10                                                                    | 0.52 | 1.31                                                                     | 3.0E-8 |
|                  | rs416352   | A  | 32315371  | 0.36        | 0.34           | 0.19   | 1.07                                                                    | 0.16 | 1.31                                                                     | 2.2E-8 |
|                  | rs419132   | C  | 32318777  | 0.29        | 0.26           | 0.03   | 1.04                                                                    | 0.44 | 1.30                                                                     | 2.0E-7 |
|                  | rs427037   | C  | 32320242  | 0.25        | 0.22           | 0.01   | 1.09                                                                    | 0.12 | 1.29                                                                     | 2.5E-7 |
|                  | rs4713859  | C  | 35514131  | 0.06        | 0.05           | 0.48   | 0.99                                                                    | 0.89 | 1.31                                                                     | 2.9E-8 |
|                  | rs4959068  | A  | 31451823  | 0.07        | 0.06           | 1.00   | 0.95                                                                    | 0.60 | 1.30                                                                     | 8.9E-8 |
|                  | rs6457499  | C  | 32306926  | 0.33        | 0.31           | 0.75   | 1.00                                                                    | 0.96 | 1.31                                                                     | 3.1E-8 |
|                  | rs6910087  | T  | 31485026  | 0.12        | 0.12           | 0.14   | 0.90                                                                    | 0.15 | 1.30                                                                     | 4.3E-8 |
|                  | rs6911024  | C  | 31476430  | 0.12        | 0.12           | 0.24   | 0.91                                                                    | 0.19 | 1.30                                                                     | 4.1E-8 |
|                  | rs6915986  | C  | 32791876  | 0.02        | 0.02           | 0.47   | 1.05                                                                    | 0.78 | 1.31                                                                     | 2.9E-8 |
|                  | rs6932730  | C  | 31462161  | 0.18        | 0.19           | 0.56   | 0.85                                                                    | 0.01 | 1.32                                                                     | 1.3E-8 |
|                  | rs6936346  | T  | 32308732  | 0.33        | 0.31           | 0.75   | 1.00                                                                    | 0.97 | 1.31                                                                     | 4.0E-8 |
|                  | rs6936707  | T  | 32792047  | 0.02        | 0.02           | 0.47   | 1.05                                                                    | 0.78 | 1.31                                                                     | 3.4E-8 |
|                  | rs9263475  | G  | 31158327  | 0.25        | 0.24           | 0.19   | 1.00                                                                    | 0.93 | 1.31                                                                     | 2.2E-8 |
|                  | rs9267853  | T  | 32303229  | 0.37        | 0.37           | 0.60   | 1.03                                                                    | 0.62 | 1.31                                                                     | 3.8E-8 |
|                  | rs9268830  | G  | 32535550  | 0.19        | 0.16           | 0.41   | 0.99                                                                    | 0.87 | 1.32                                                                     | 1.8E-7 |
|                  | rs9296153  | T  | 35488200  | 0.03        | 0.02           | 0.22   | 0.97                                                                    | 0.86 | 1.31                                                                     | 2.8E-8 |
|                  | rs9296154  | A  | 35495356  | 0.03        | 0.02           | 0.21   | 0.99                                                                    | 0.94 | 1.31                                                                     | 2.9E-8 |
|                  | rs9357138  | T  | 32327816  | 0.16        | 0.13           | 0.01   | 1.15                                                                    | 0.04 | 1.28                                                                     | 3.5E-7 |
|                  | rs9454898  | C  | 70576382  | 0.00        | 0.00           | 1.00   | 0.98                                                                    | 0.97 | 1.31                                                                     | 3.8E-8 |
|                  | rs9462081  | C  | 35483984  | 0.03        | 0.02           | 0.22   | 1.00                                                                    | 0.98 | 1.31                                                                     | 3.2E-8 |
|                  | rs9463680  | C  | 51251060  | 0.01        | 0.01           | 0.16   | 1.08                                                                    | 0.74 | 1.31                                                                     | 2.8E-8 |
|                  | rs9470023  | T  | 35506335  | 0.02        | 0.02           | 0.18   | 0.95                                                                    | 0.76 | 1.31                                                                     | 2.9E-8 |
|                  | rs9496752  | T  | 144078155 | 0.00        | 0.00           | 1.00   | 1.43                                                                    | 0.58 | 1.31                                                                     | 2.9E-8 |

PC1 – associated variants in *HLA*

**(b)** Association of *HLA-DRA* SNP with PD conditioned on SNPs that are associated with PC1 ( $P < 10^{-20}$ ) and in LD ( $r^2 > 0.05$ ) with rs3129882 adjusted for (i) sex and PC1-associated SNPs, and (ii) sex, age, PC1, PC2 and PC1-associated SNPs. Test begins with the top PC1-associated SNP and every iteration is cumulative including the prior PC1 SNP and adding the next significant one.

| Number of PC1-SNPs adjusted for | PC1-associated SNPs | BP       | P for PC1-Association | $r^2$ with <i>HLA-DRA</i> rs3129882 | (i) rs3129882 association with PD adjusted for sex & PC1-assoc SNPs |           |        | (ii) rs3129882 association with PD adjusted for sex, age, PC1, PC2 & PC1-assoc SNPs |           |        |
|---------------------------------|---------------------|----------|-----------------------|-------------------------------------|---------------------------------------------------------------------|-----------|--------|-------------------------------------------------------------------------------------|-----------|--------|
|                                 |                     |          |                       |                                     | OR                                                                  | 95% CI    | P      | OR                                                                                  | 95% CI    | P      |
| 1                               | rs9268628           | 32513843 | 1.7E-28               | 0.26                                | 1.26                                                                | 1.13-1.41 | 2.6E-5 | 1.28                                                                                | 1.15-1.43 | 1.1E-5 |
| 2                               | rs9268628           | 32513843 | 1.7E-28               | 0.26                                | 1.24                                                                | 1.11-1.39 | 1.3E-4 | 1.28                                                                                | 1.14-1.43 | 2.2E-5 |
|                                 | rs3104404           | 32790152 | 1.3E-34               | 0.19                                |                                                                     |           |        |                                                                                     |           |        |
| 3                               | rs9268628           | 32513843 | 1.7E-28               | 0.26                                | 1.24                                                                | 1.11-1.39 | 1.9E-4 | 1.27                                                                                | 1.14-1.43 | 3.2E-5 |
|                                 | rs3104404           | 32790152 | 1.3E-34               | 0.19                                |                                                                     |           |        |                                                                                     |           |        |
|                                 | rs4424079           | 32710147 | 4.0E-28               | 0.15                                |                                                                     |           |        |                                                                                     |           |        |
| 4                               | rs9268628           | 32513843 | 1.7E-28               | 0.26                                | 1.25                                                                | 1.12-1.40 | 1.2E-4 | 1.28                                                                                | 1.14-1.44 | 2.1E-5 |
|                                 | rs3104404           | 32790152 | 1.3E-34               | 0.19                                |                                                                     |           |        |                                                                                     |           |        |
|                                 | rs4424079           | 32710147 | 4.0E-28               | 0.15                                |                                                                     |           |        |                                                                                     |           |        |
|                                 | rs17577980          | 32467799 | 2.3E-33               | 0.14                                |                                                                     |           |        |                                                                                     |           |        |
| 5                               | rs9268628           | 32513843 | 1.7E-28               | 0.26                                | 1.25                                                                | 1.11-1.40 | 1.2E-4 | 1.28                                                                                | 1.14-1.44 | 2.2E-5 |
|                                 | rs3104404           | 32790152 | 1.3E-34               | 0.19                                |                                                                     |           |        |                                                                                     |           |        |
|                                 | rs4424079           | 32710147 | 4.0E-28               | 0.15                                |                                                                     |           |        |                                                                                     |           |        |
|                                 | rs17577980          | 32467799 | 2.3E-33               | 0.14                                |                                                                     |           |        |                                                                                     |           |        |
|                                 | rs17208811          | 32478440 | 1.3E-29               | 0.12                                |                                                                     |           |        |                                                                                     |           |        |
| 6                               | rs9268628           | 32513843 | 1.7E-28               | 0.26                                | 1.245                                                               | 1.11-1.39 | 1.5E-4 | 1.28                                                                                | 1.14-1.44 | 2.3E-5 |
|                                 | rs3104404           | 32790152 | 1.3E-34               | 0.19                                |                                                                     |           |        |                                                                                     |           |        |
|                                 | rs4424079           | 32710147 | 4.0E-28               | 0.15                                |                                                                     |           |        |                                                                                     |           |        |
|                                 | rs17577980          | 32467799 | 2.3E-33               | 0.14                                |                                                                     |           |        |                                                                                     |           |        |
|                                 | rs17208811          | 32478440 | 1.3E-29               | 0.12                                |                                                                     |           |        |                                                                                     |           |        |
|                                 | rs8192564           | 32299800 | 4.8E-33               | 0.11                                |                                                                     |           |        |                                                                                     |           |        |
| 7                               | rs9268628           | 32513843 | 1.7E-28               | 0.26                                | 1.25                                                                | 1.12-1.40 | 1.0E-4 | 1.28                                                                                | 1.15-1.44 | 2.0E-5 |
|                                 | rs3104404           | 32790152 | 1.3E-34               | 0.19                                |                                                                     |           |        |                                                                                     |           |        |
|                                 | rs4424079           | 32710147 | 4.0E-28               | 0.15                                |                                                                     |           |        |                                                                                     |           |        |
|                                 | rs17577980          | 32467799 | 2.3E-33               | 0.14                                |                                                                     |           |        |                                                                                     |           |        |
|                                 | rs17208811          | 32478440 | 1.3E-29               | 0.12                                |                                                                     |           |        |                                                                                     |           |        |
|                                 | rs8192564           | 32299800 | 4.8E-33               | 0.11                                |                                                                     |           |        |                                                                                     |           |        |
|                                 | rs380571            | 32317540 | 1.6E-86               | 0.08                                |                                                                     |           |        |                                                                                     |           |        |
| 8                               | rs9268628           | 32513843 | 1.7E-28               | 0.26                                | 1.27                                                                | 1.13-1.42 | 5.2E-5 | 1.30                                                                                | 1.16-1.46 | 1.0E-5 |
|                                 | rs3104404           | 32790152 | 1.3E-34               | 0.19                                |                                                                     |           |        |                                                                                     |           |        |
|                                 | rs4424079           | 32710147 | 4.0E-28               | 0.15                                |                                                                     |           |        |                                                                                     |           |        |
|                                 | rs17577980          | 32467799 | 2.3E-33               | 0.14                                |                                                                     |           |        |                                                                                     |           |        |
|                                 | rs17208811          | 32478440 | 1.3E-29               | 0.12                                |                                                                     |           |        |                                                                                     |           |        |
|                                 | rs8192564           | 32299800 | 4.8E-33               | 0.11                                |                                                                     |           |        |                                                                                     |           |        |
|                                 | rs380571            | 32317540 | 1.6E-86               | 0.08                                |                                                                     |           |        |                                                                                     |           |        |
|                                 | rs17581425          | 32788563 | 2.5E-29               | 0.06                                |                                                                     |           |        |                                                                                     |           |        |

(c) Association of *HLA-DRA* SNP with PD conditioned on PC1-SNPs that are in LD ( $r^2 \geq 0.30$ ) with *HLA-DRA* SNP.

| Number of PC1-SNPs adjusted for | PC1-associated SNP | BP       | P For PC1-Association | $r^2$ with <i>HLA-DRA</i> rs3129882 | rs3129882 assoc with PD adj for sex & PC1 SNPs in column 1 |           |        | rs3129882 assoc with PD adj for sex, age, PC1, PC2 & PC1 SNPs in column 1 |           |        |
|---------------------------------|--------------------|----------|-----------------------|-------------------------------------|------------------------------------------------------------|-----------|--------|---------------------------------------------------------------------------|-----------|--------|
|                                 |                    |          |                       |                                     | OR                                                         | 95% CI    | P      | OR                                                                        | 95% CI    | P      |
| 1                               | rs3129883          | 32518115 | 1.4E-8                | 0.44                                | 1.40                                                       | 1.23-1.58 | 2.3E-7 | 1.34                                                                      | 1.18-1.52 | 9.0E-6 |
| 2                               | rs3129883          | 32518115 | 1.4E-8                | 0.44                                | 1.36                                                       | 1.17-1.58 | 6.3E-5 | 1.32                                                                      | 1.14-1.54 | 3.1E-4 |
|                                 | rs2076536          | 32447326 | 2.3E-15               | 0.35                                |                                                            |           |        |                                                                           |           |        |
| 3                               | rs3129883          | 32518115 | 1.4E-8                | 0.44                                | 1.38                                                       | 1.16-1.63 | 1.8E-4 | 1.34                                                                      | 1.13-1.59 | 6.3E-4 |
|                                 | rs2076536          | 32447326 | 2.3E-15               | 0.35                                |                                                            |           |        |                                                                           |           |        |
|                                 | rs3129859          | 32508917 | 2.8E-8                | 0.34                                |                                                            |           |        |                                                                           |           |        |
| 4                               | rs3129883          | 32518115 | 1.4E-8                | 0.44                                | 1.40                                                       | 1.18-1.65 | 1.0E-4 | 1.35                                                                      | 1.14-1.60 | 5.0E-4 |
|                                 | rs2076536          | 32447326 | 2.3E-15               | 0.35                                |                                                            |           |        |                                                                           |           |        |
|                                 | rs3129859          | 32508917 | 2.8E-8                | 0.34                                |                                                            |           |        |                                                                           |           |        |
|                                 | rs2076534          | 32470394 | 3.8E-11               | 0.33                                |                                                            |           |        |                                                                           |           |        |
| 5                               | rs3129883          | 32518115 | 1.4E-8                | 0.44                                | 1.42                                                       | 1.20-1.69 | 5.9E-5 | 1.38                                                                      | 1.16-1.64 | 3.1E-4 |
|                                 | rs2076536          | 32447326 | 2.3E-15               | 0.35                                |                                                            |           |        |                                                                           |           |        |
|                                 | rs3129859          | 32508917 | 2.8E-8                | 0.34                                |                                                            |           |        |                                                                           |           |        |
|                                 | rs2076534          | 32470394 | 3.8E-11               | 0.33                                |                                                            |           |        |                                                                           |           |        |
| 6                               | rs3135334          | 32510664 | 8.7E-10               | 0.32                                | 1.50                                                       | 1.26-1.80 | 9.3E-6 | 1.47                                                                      | 1.23-1.77 | 2.9E-5 |
|                                 | rs3129883          | 32518115 | 1.4E-8                | 0.44                                |                                                            |           |        |                                                                           |           |        |
|                                 | rs2076536          | 32447326 | 2.3E-15               | 0.35                                |                                                            |           |        |                                                                           |           |        |
|                                 | rs3129859          | 32508917 | 2.8E-8                | 0.34                                |                                                            |           |        |                                                                           |           |        |
|                                 | rs2076534          | 32470394 | 3.8E-11               | 0.33                                |                                                            |           |        |                                                                           |           |        |
|                                 | rs3129888          | 32519704 | 2.8E-13               | 0.32                                |                                                            |           |        |                                                                           |           |        |
| 7                               | rs3129883          | 32518115 | 1.4E-8                | 0.44                                | 1.50                                                       | 1.26-1.80 | 9.6E-6 | 1.48                                                                      | 1.23-1.78 | 2.6E-5 |
|                                 | rs2076536          | 32447326 | 2.3E-15               | 0.35                                |                                                            |           |        |                                                                           |           |        |
|                                 | rs3129859          | 32508917 | 2.8E-8                | 0.34                                |                                                            |           |        |                                                                           |           |        |
|                                 | rs2076534          | 32470394 | 3.8E-11               | 0.33                                |                                                            |           |        |                                                                           |           |        |
|                                 | rs3135334          | 32510664 | 8.7E-10               | 0.32                                |                                                            |           |        |                                                                           |           |        |
|                                 | rs3129888          | 32519704 | 2.8E-13               | 0.32                                |                                                            |           |        |                                                                           |           |        |
|                                 | rs3135343          | 32504291 | 4.0E-12               | 0.31                                |                                                            |           |        |                                                                           |           |        |
| 8                               | rs3129883          | 32518115 | 1.4E-8                | 0.44                                | 1.50                                                       | 1.25-1.80 | 1.0E-5 | 1.48                                                                      | 1.23-1.78 | 2.8E-5 |
|                                 | rs2076536          | 32447326 | 2.3E-15               | 0.35                                |                                                            |           |        |                                                                           |           |        |
|                                 | rs3129859          | 32508917 | 2.8E-8                | 0.34                                |                                                            |           |        |                                                                           |           |        |
|                                 | rs2076534          | 32470394 | 3.8E-11               | 0.33                                |                                                            |           |        |                                                                           |           |        |
|                                 | rs3135334          | 32510664 | 8.7E-10               | 0.32                                |                                                            |           |        |                                                                           |           |        |
|                                 | rs3129888          | 32519704 | 2.8E-13               | 0.32                                |                                                            |           |        |                                                                           |           |        |
|                                 | rs3135343          | 32504291 | 4.0E-12               | 0.31                                |                                                            |           |        |                                                                           |           |        |
|                                 | rs3129877          | 32516575 | 1.2E-11               | 0.30                                |                                                            |           |        |                                                                           |           |        |

## Supplementary Figure 1. Population substructure in Americans of European ancestry.

**(a)** PCA was used to plot NGRC samples (blue) against HapMap samples (Caucasian: purple, Chinese-Japanese: red, Yoruba African: green). **(b)** PCA was repeated without HapMap samples for an in-depth look at substructure within NGRC. PC1 and PC2 separate two clusters. **(c)** Subjects who reported as Ashkenazi Jewish are plotted in red and those who did not specify and therefore may or may not be Jewish are blue. The core of each cluster, used for population structure sub-analyses (**Suppl Table 2**), are marked. **(d)** Subjects whose paternal and maternal ancestors immigrated to the US from the same European country are designated by the same color. The resulting substructure follows the map of Europe, with Italians at the bottom (blue squares), moving clockwise to northwest into Germany (dark green triangles), France (light green squares) and Great Britain (red squares), then north to Scandinavia (black circles), and east to Eastern European countries (pink circle) and Russia (pink triangle). The cluster to the far right, which was shown above to be Ashkenazi Jews, immigrated from Russia, E. Europe and Germany, which is historically accurate.

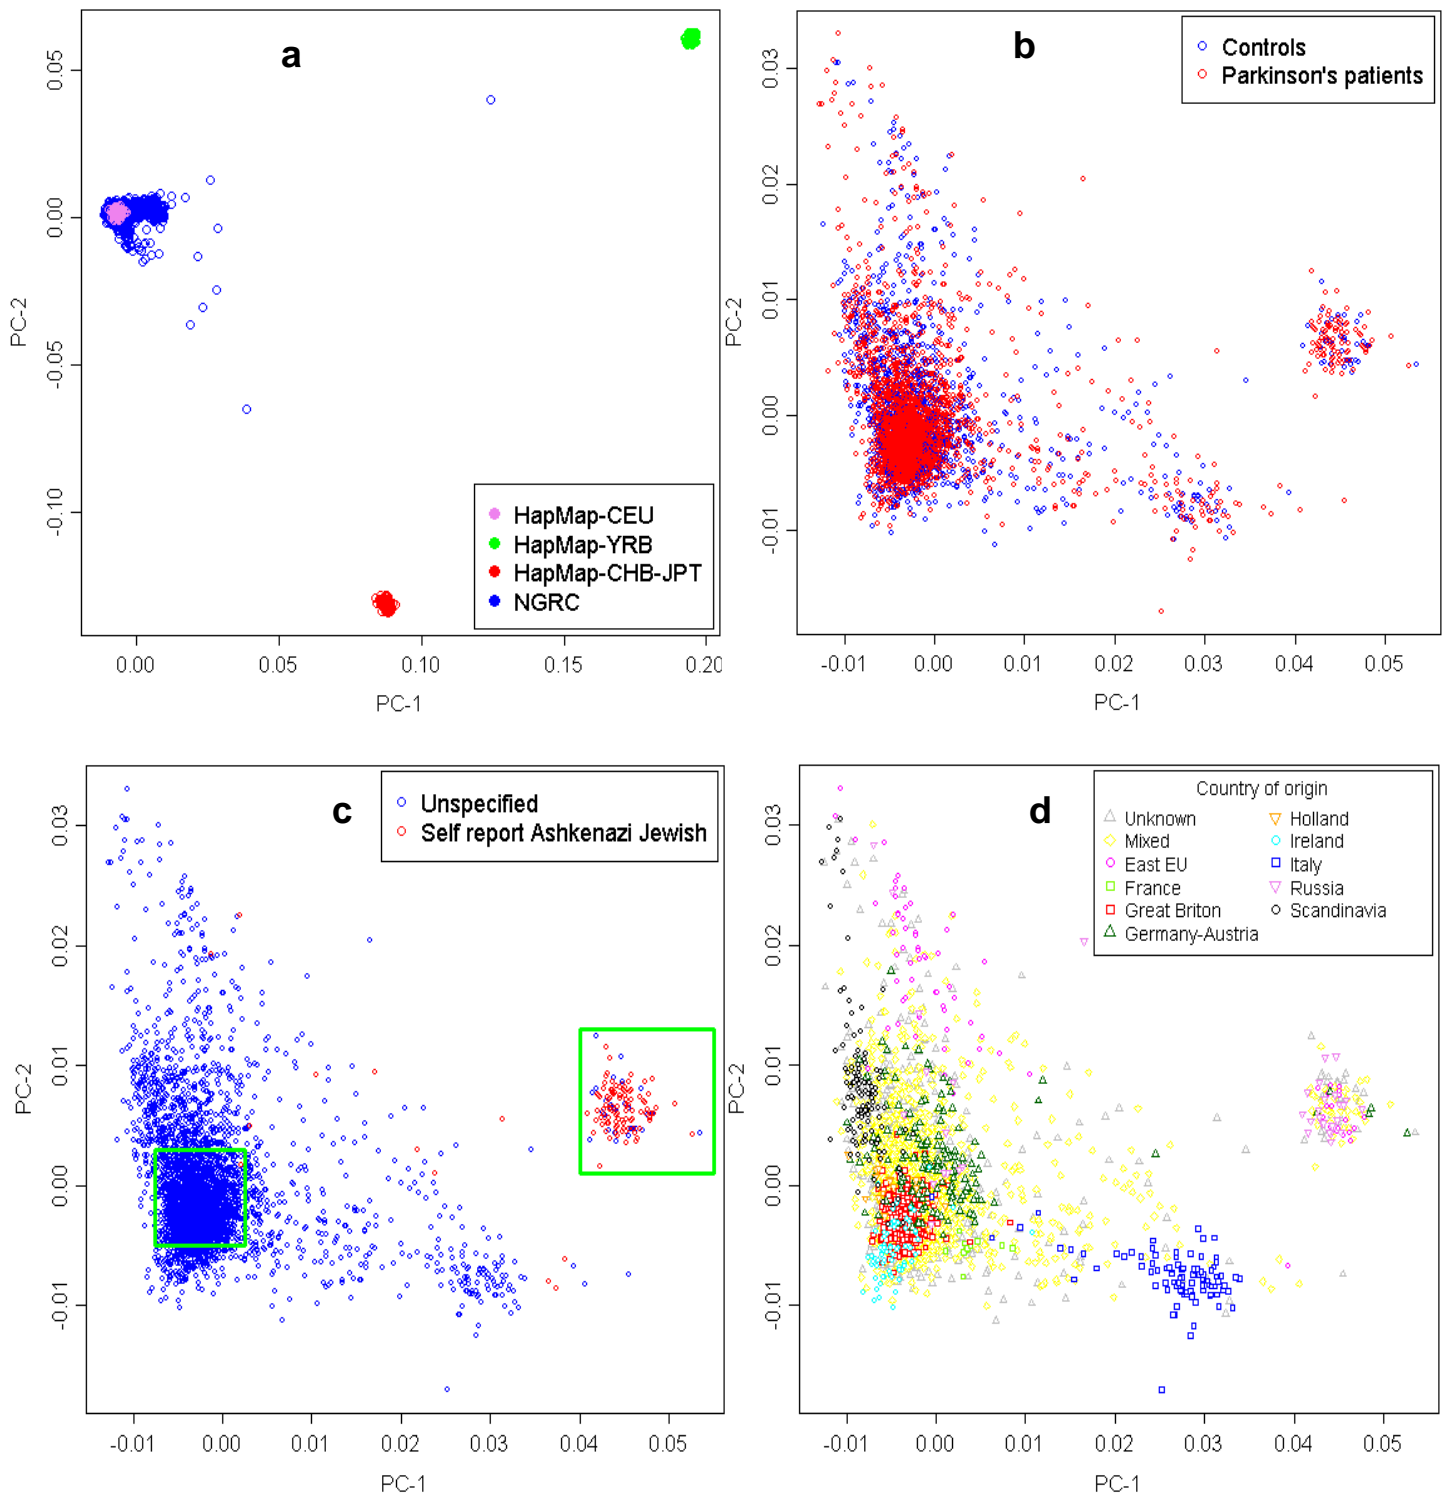

## Supplementary Figure 2. Quantile-quantile plot

Distribution of expected P-values for no disease association (black line) vs. the observed P-values in NGRC dataset. The observed are plotted once for all 811,597 SNPs tested (red), once excluding *SNCA* and *MAPT* regions (green), and again excluding *SNCA*, *MAPT* and sub-region of *HLA* including PC1 and PD associated SNPs (blue).  $\lambda$ =Genomic inflation factor.

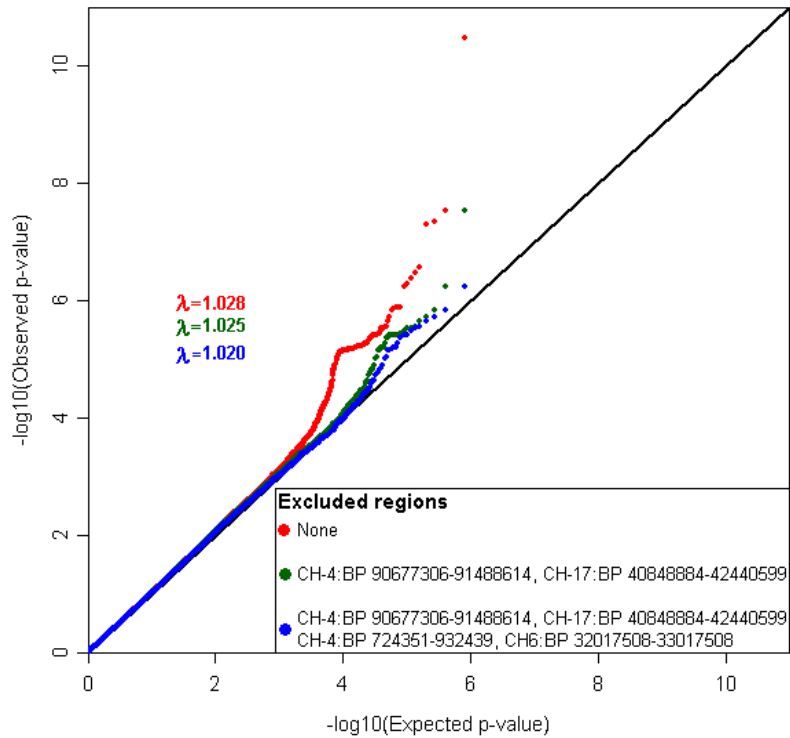

**Supplementary Figure 3. GAK (PARK17)**

(a) Manhattan plot of Ch4p16 (bp 700000-970000) surrounding PD-associated SNP (rs11248051) in GAK region.  
 (b) Haploview of all SNPs in the region with PD-association  $P < 0.01$ .

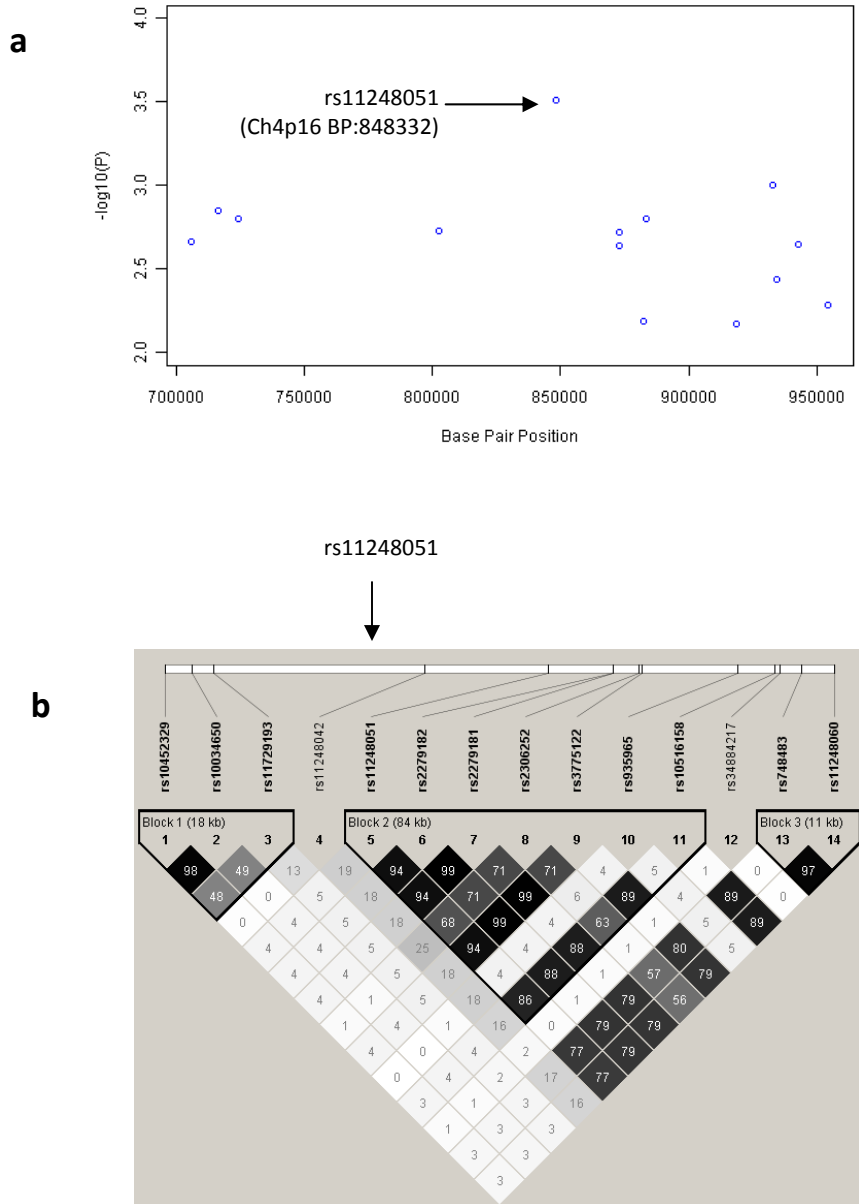

### Supplementary Figure 4. Odds ratios for the combination of *SNCA*, *MAPT*, *GAK* and *HLA*.

The individual ORs for each locus were similar; we therefore pooled them and assumed each risk allele increased risk by the same amount. The number of risk alleles (0 to 8 alleles) was regressed on disease status using logistic regression (OR and 95% CI are shown below). Due to small numbers, subjects who had 0 or 1 risk allele were combined as “low-risk” and used as reference. Similarly, genotypes with 6 or more risk alleles were rare and were therefore combined.

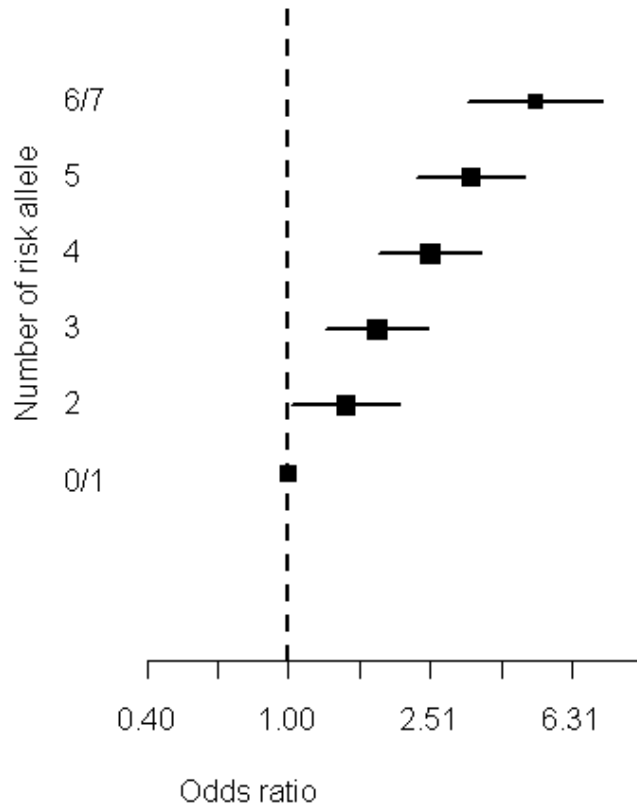

| Carrier status<br>(No of risk alleles) | OR (95% CI)      | P                     | No of subjects |         |
|----------------------------------------|------------------|-----------------------|----------------|---------|
|                                        |                  |                       | Case           | Control |
| 0                                      | Ref.             | Ref.                  | 4              | 10      |
| 1                                      | Ref.             | Ref.                  | 55             | 114     |
| 2                                      | 1.45 (1.03-2.05) | 0.04                  | 271            | 393     |
| 3                                      | 1.45 (1.03-2.05) | $6.9 \times 10^{-4}$  | 548            | 650     |
| 4                                      | 2.49 (1.79-3.47) | $6.5 \times 10^{-8}$  | 619            | 522     |
| 5                                      | 3.26 (2.29-4.62) | $4.2 \times 10^{-11}$ | 364            | 235     |
| 6                                      |                  |                       | 117            | 56      |
| 7                                      | 4.95 (3.20-7.64) | $5.5 \times 10^{-13}$ | 22             | 3       |
| 8                                      |                  |                       | 0              | 0       |

## Supplementary Figure 5. Localization of genomic regions associated with principal component

To pinpoint the genomic regions that contribute most to PC1, linear regression was used to test association of SNPs with PC1 and the P-values were displayed in a Manhattan plot. As expected, several peaks were evident across the genome, most notably, a peak at the lactase (*LTC*) gene on chromosome 2 and one in *HLA* on chromosome 6. (Also see **Supplementary Figure 6**, and **Supplementary Table 5**).

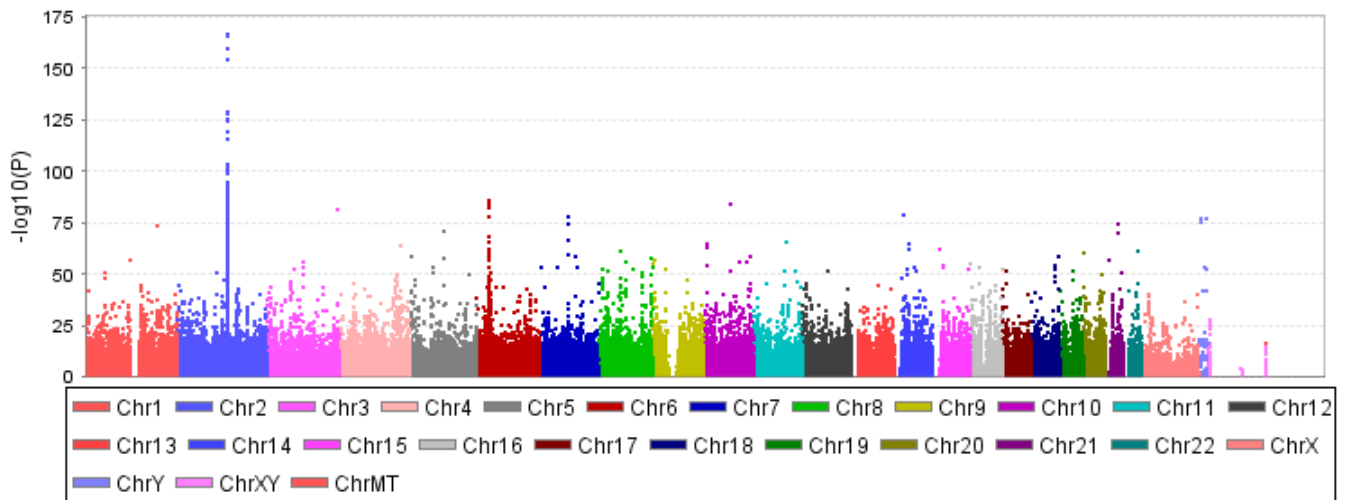



## Supplementary Figure 6. LD between PD-associated SNPs and PC1-associated SNPs within *HLA*

**(a)** Manhattan plot for the entire *HLA* complex (Chr6: 29MB-33Mb) indicating PD-associated SNPs with  $P < 0.01$ . The association of each SNP with PC1 is indicated by color representing the P value. **(b)** Manhattan plot for the entire *HLA* complex (Chr6: 29MB-33Mb) indicating LD ( $r^2$ ) between all SNPs associated with PD ( $P < 0.01$ ) and the *HLA-DRA* SNP. The association of each SNP with PC1 is indicated by color representing the P value. **(c)** The haploview diagram shows the level of LD ( $r^2$ ) among PD-associated SNPs ( $P < 0.01$ ) in the Chr6: 29MB-33Mb region.

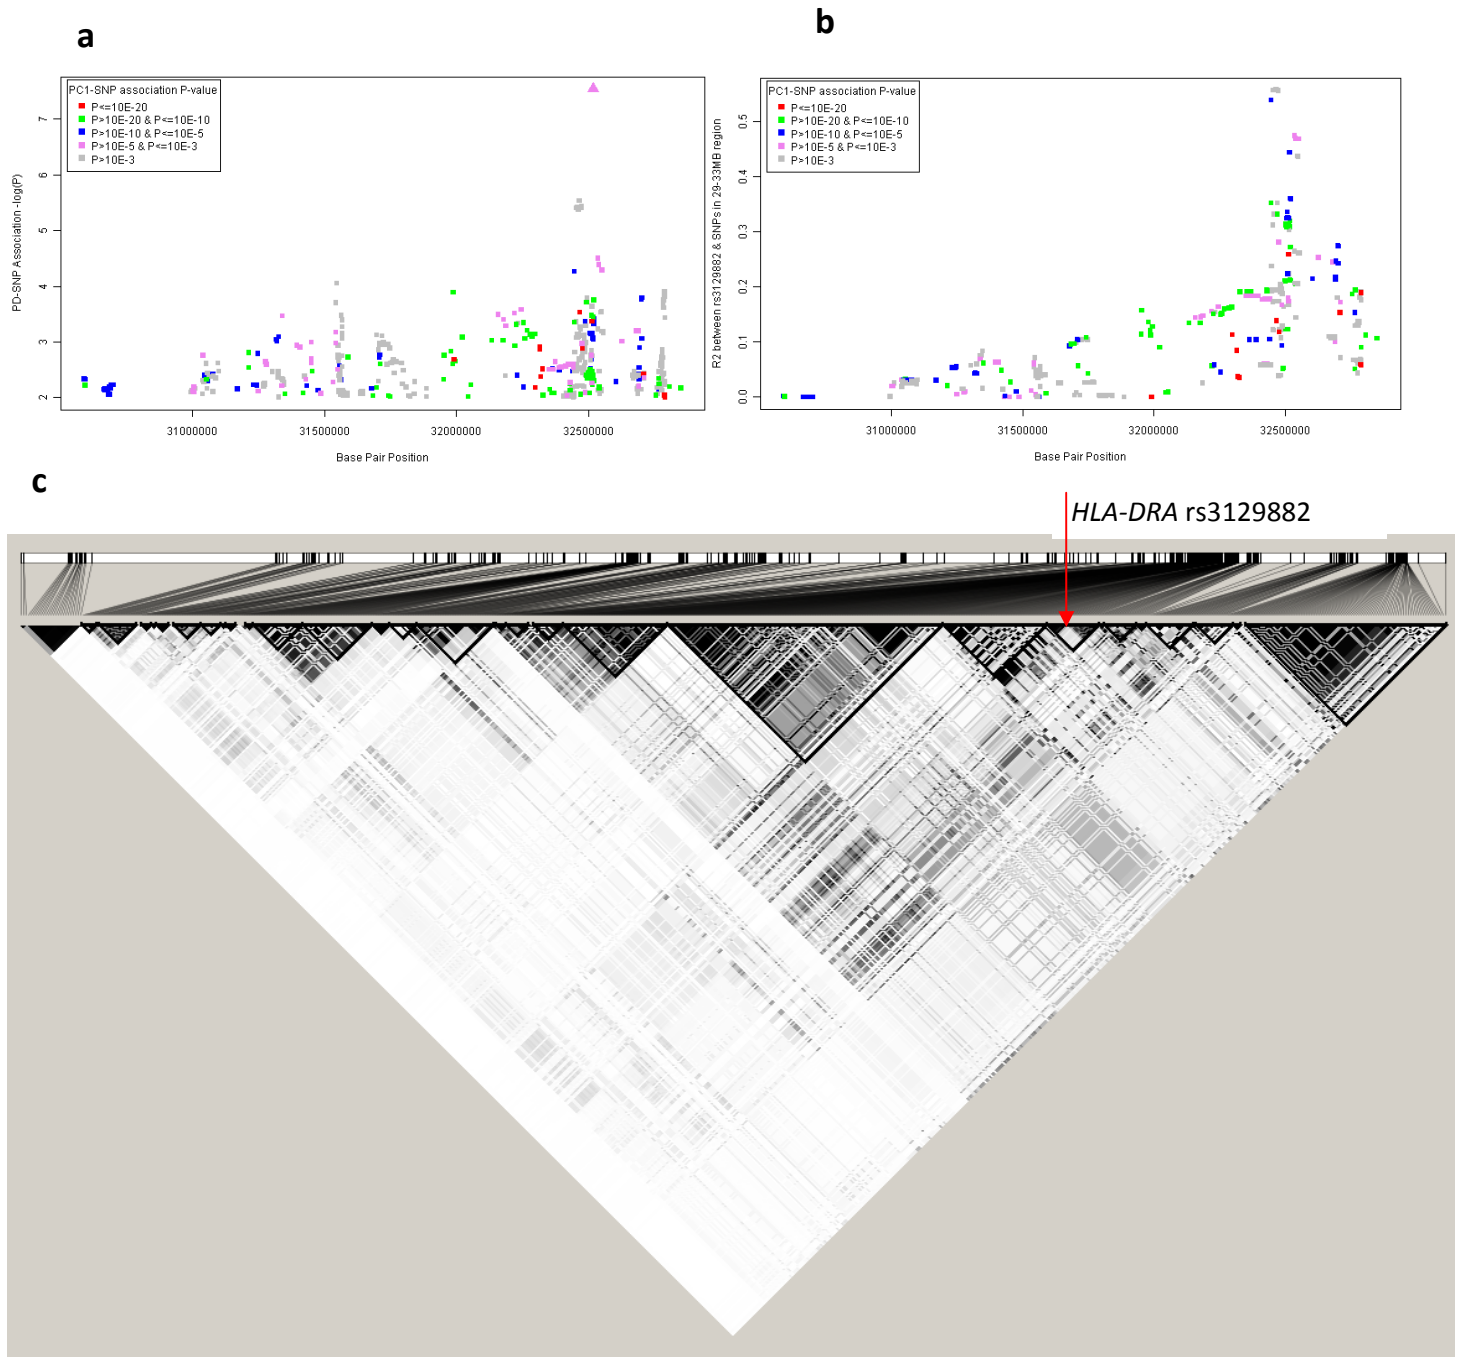

## Supplementary References

1. Pankratz, N. et al. Genomewide association study for susceptibility genes contributing to familial Parkinson disease. *Hum Genet* **124**, 593-605 (2009).
2. Satake, W. et al. Genome-wide association study identifies common variants at four loci as genetic risk factors for Parkinson's disease. *Nat Genet* **41**, 1303-7 (2009).
3. Simon-Sanchez, J. et al. Genome-wide association study reveals genetic risk underlying Parkinson's disease. *Nat Genet* **41**, 1308-12 (2009).
